# Supplementary material
Source: PubMed Central journal article supplement (PMC6248088)
Supplement: jamaoncol-4-1519-s001.pdf [file jamaoncol-4-1519-s001.pdf]

## Supplementary Online Content

Dood RL, Zhao Y, Armbruster SD, et al. Defining survivorship trajectories across patients with solid tumors: an evidence-based approach. *JAMA Oncol*. Published online June 2, 2018. doi:10.1001/jamaoncol.2018.2761

**eTable 1.** Baseline demographic data for cohort and cancer types

**eFigure 1.** Mortality gap creation

**eTable 2.** Survivorship trajectory details and causes of death

**eFigure 2.** Age-sex matched mortality gap for all tumor types

**eFigure 3.** Ovarian cancer mortality gaps by histology

This supplementary material has been provided by the authors to give readers additional information about their work.

eTable 1: Baseline demographic data for cohort and cancer types

| Tissue                  | N      | Survival        | Follow-up       | Age                | Sex           | Race           |              |              |            | Surgical management | Radiation therapy |
|-------------------------|--------|-----------------|-----------------|--------------------|---------------|----------------|--------------|--------------|------------|---------------------|-------------------|
| metastatic status       |        | Median in years | median in years | mean in years (sd) | n= female     | n= white       | n= black     | n= other     | n= unknown | n=yes               | n=yes             |
| <b>Digestive System</b> |        |                 |                 |                    |               |                |              |              |            |                     |                   |
| Colon                   | 172769 | 5.3             | 4               | 69.2 (12.5)        | 88094 (51%)   | 144501 (83.6%) | 15730 (9.1%) | 12197 (7.1%) | 341 (0.2%) | 156886 (90.8%)      | 8001 (4.6%)       |
| Local                   | 132472 | 8.3             | 6               | 69.3 (12.3)        | 67536 (51%)   | 111117 (83.9%) | 11148 (8.4%) | 9932 (7.5%)  | 275 (0.2%) | 129891 (98.1%)      | 5285 (4%)         |
| Distant                 | 32307  | 0.8             | 1               | 67.6 (12.9)        | 16170 (50.1%) | 26645 (82.5%)  | 3659 (11.3%) | 1987 (6.2%)  | 16 (0%)    | 23936 (74.1%)       | 2331 (7.2%)       |
| Rectum                  | 77649  | 5.9             | 4               | 65.7 (13.2)        | 33100 (42.6%) | 65507 (84.4%)  | 4818 (6.2%)  | 6958 (9%)    | 366 (0.5%) | 64770 (83.4%)       | 26546 (34.2%)     |
| Local                   | 61841  | 8.5             | 6               | 65.3 (13)          | 26372 (42.6%) | 52231 (84.5%)  | 3619 (5.9%)  | 5704 (9.2%)  | 287 (0.5%) | 57391 (92.8%)       | 20993 (33.9%)     |
| Distant                 | 10197  | 0.9             | 1               | 64.8 (13.1)        | 4144 (40.6%)  | 8564 (84%)     | 738 (7.2%)   | 884 (8.7%)   | 11 (0.1%)  | 5158 (50.6%)        | 3889 (38.1%)      |
| Pancreas                | 72976  | 0.4             | 0               | 67.8 (12.5)        | 36643 (50.2%) | 59262 (81.2%)  | 8160 (11.2%) | 5460 (7.5%)  | 94 (0.1%)  | 12205 (16.7%)       | 14378 (19.7%)     |
| Local                   | 27730  | 0.8             | 1               | 67.7 (12.3)        | 14379 (51.9%) | 22465 (81%)    | 3037 (11%)   | 2196 (7.9%)  | 32 (0.1%)  | 9261 (33.4%)        | 8958 (32.3%)      |
| Distant                 | 35519  | 0.2             | 0               | 66.1 (12)          | 16779 (47.2%) | 28597 (80.5%)  | 4167 (11.7%) | 2722 (7.7%)  | 33 (0.1%)  | 2588 (7.3%)         | 4349 (12.2%)      |
| Stomach                 | 54078  | 0.9             | 1               | 67.8 (13.4)        | 20556 (38%)   | 39831 (73.7%)  | 5781 (10.7%) | 8364 (15.5%) | 102 (0.2%) | 31219 (57.7%)       | 9743 (18%)        |
| Local                   | 30425  | 1.9             | 2               | 67.9 (13)          | 11555 (38%)   | 22177 (72.9%)  | 3117 (10.2%) | 5072 (16.7%) | 59 (0.2%)  | 24497 (80.5%)       | 5777 (19%)        |
| Distant                 | 17922  | 0.4             | 0               | 65.6 (13.3)        | 6328 (35.3%)  | 13265 (74%)    | 2019 (11.3%) | 2624 (14.6%) | 14 (0.1%)  | 5841 (32.6%)        | 3332 (18.6%)      |
| Esophagus               | 32223  | 0.8             | 1               | 65.7 (11.7)        | 7886 (24.5%)  | 25351 (78.7%)  | 4951 (15.4%) | 1891 (5.9%)  | 30 (0.1%)  | 9789 (30.4%)        | 19748 (61.3%)     |
| Local                   | 17605  | 1.2             | 1               | 65.9 (11.4)        | 4373 (24.8%)  | 13974 (79.4%)  | 2603 (14.8%) | 1009 (5.7%)  | 19 (0.1%)  | 7960 (45.2%)        | 11231 (63.8%)     |
| Distant                 | 9492   | 0.5             | 0               | 63.5 (11.2)        | 1873 (19.7%)  | 7357 (77.5%)   | 1502 (15.8%) | 630 (6.6%)   | 3 (0%)     | 1286 (13.5%)        | 5624 (59.2%)      |
| Liver                   | 29653  | 0.7             | 1               | 62 (14.8)          | 8235 (27.8%)  | 18897 (63.7%)  | 3951 (13.3%) | 6740 (22.7%) | 65 (0.2%)  | 7012 (23.6%)        | 2112 (7.1%)       |
| Local                   | 19687  | 1               | 1               | 61.3 (14.4)        | 5283 (26.8%)  | 12219 (62.1%)  | 2691 (13.7%) | 4739 (24.1%) | 38 (0.2%)  | 6341 (32.2%)        | 1120 (5.7%)       |
| Distant                 | 4989   | 0.2             | 0               | 60.6               | 1340          | 3142           | 774          | 1066         | 7          | 455                 | 809               |

|                  |       |      |   |        |         |         |         |          |        |         |         |
|------------------|-------|------|---|--------|---------|---------|---------|----------|--------|---------|---------|
|                  |       |      |   | (16.1) | (26.9%) | (63%)   | (15.5%) | (21.4%)  | (0.1%) | (9.1%)  | (16.2%) |
| Gum, mouth floor | 23620 | 4.9  | 4 | 62.1   | 9212    | 19846   | 2523    | 1138     | 113    | 16642   | 10441   |
|                  |       |      |   | (14.1) | (39%)   | (84%)   | (10.7%) | (4.8%)   | (0.5%) | (70.5%) | (44.2%) |
| Local            | 19121 | 5.8  | 4 | 62.6   | 7653    | 16119   | 1979    | 957      | 66     | 14965   | 8324    |
|                  |       |      |   | (13.4) | (40%)   | (84.3%) | (10.3%) | (5%)     | (0.3%) | (78.3%) | (43.5%) |
| Distant          | 1486  | 1.1  | 1 | 62.3   | 497     | 1157    | 263     | 65       | 1      | 757     | 976     |
|                  |       |      |   | (12.8) | (33.4%) | (77.9%) | (17.7%) | (4.4%)   | (0.1%) | (50.9%) | (65.7%) |
| Tongue           | 22419 | 5.3  | 3 | 60.7   | 7082    | 19052   | 1920    | 1349     | 98     | 13419   | 12875   |
|                  |       |      |   | (13.3) | (31.6%) | (85%)   | (8.6%)  | (6%)     | (0.4%) | (59.9%) | (57.4%) |
| Local            | 17991 | 6.5  | 4 | 60.5   | 5790    | 15442   | 1359    | 1117     | 73     | 11915   | 9951    |
|                  |       |      |   | (13.2) | (32.2%) | (85.8%) | (7.6%)  | (6.2%)   | (0.4%) | (66.2%) | (55.3%) |
| Distant          | 2830  | 1.4  | 1 | 60.6   | 704     | 2247    | 438     | 143      | 2      | 1070    | 2201    |
|                  |       |      |   | (11.8) | (24.9%) | (79.4%) | (15.5%) | (5.1%)   | (0.1%) | (37.8%) | (77.8%) |
| Gallbladder      | 19800 | 0.8  | 1 | 69.5   | 11762   | 15950   | 1434    | 2385     | 31     | 10929   | 3684    |
|                  |       |      |   | (12.8) | (59.4%) | (80.6%) | (7.2%)  | (12%)    | (0.2%) | (55.2%) | (18.6%) |
| Local            | 12449 | 1.2  | 1 | 69.1   | 7174    | 10011   | 848     | 1570     | 20     | 8932    | 2711    |
|                  |       |      |   | (12.6) | (57.6%) | (80.4%) | (6.8%)  | (12.6%)  | (0.2%) | (71.7%) | (21.8%) |
| Distant          | 5326  | 0.3  | 0 | 67.8   | 3440    | 4260    | 462     | 600      | 4      | 1745    | 739     |
|                  |       |      |   | (12.5) | (64.6%) | (80%)   | (8.7%)  | (11.3%)  | (0.1%) | (32.8%) | (13.9%) |
| Small intestine  | 14143 | 6.2  | 3 | 62     | 6483    | 11498   | 1731    | 879      | 35     | 11153   | 861     |
|                  |       |      |   | (15.3) | (45.8%) | (81.3%) | (12.2%) | (6.2%)   | (0.2%) | (78.9%) | (6.1%)  |
| Local            | 7537  | 8.6  | 4 | 62.5   | 3579    | 6008    | 1058    | 444      | 27     | 6819    | 347     |
|                  |       |      |   | (14.3) | (47.5%) | (79.7%) | (14%)   | (5.9%)   | (0.4%) | (90.5%) | (4.6%)  |
| Distant          | 3279  | 1.8  | 2 | 62.6   | 1545    | 2696    | 415     | 166      | 2      | 2208    | 216     |
|                  |       |      |   | (13.2) | (47.1%) | (82.2%) | (12.7%) | (5.1%)   | (0.1%) | (67.3%) | (6.6%)  |
| Anus             | 13966 | 11   | 4 | 57.1   | 6749    | 11416   | 1738    | 529      | 283    | 8253    | 6938    |
|                  |       |      |   | (15.2) | (48.3%) | (81.7%) | (12.4%) | (3.8%)   | (2%)   | (59.1%) | (49.7%) |
| Local            | 11996 | 12.7 | 5 | 56.3   | 5619    | 9790    | 1470    | 460      | 276    | 7582    | 5651    |
|                  |       |      |   | (15.1) | (46.8%) | (81.6%) | (12.3%) | (3.8%)   | (2.3%) | (63.2%) | (47.1%) |
| Distant          | 1079  | 1.4  | 1 | 61.6   | 626     | 868     | 162     | 49       | 0      | 400     | 770     |
|                  |       |      |   | (14.1) | (58%)   | (80.4%) | (15%)   | (4.5%)   | (0%)   | (37.1%) | (71.4%) |
| Lip              | 11054 | 11.8 | 9 | 65.3   | 1812    | 10718   | 79      | 111 (1%) | 146    | 9885    | 695     |
|                  |       |      |   | (14.2) | (16.4%) | (97%)   | (0.7%)  |          | (1.3%) | (89.4%) | (6.3%)  |
| Local            | 9958  | 11.9 | 9 | 65.3   | 1608    | 9676    | 68      | 99 (1%)  | 115    | 9322    | 570     |
|                  |       |      |   | (14.2) | (16.1%) | (97.2%) | (0.7%)  |          | (1.2%) | (93.6%) | (5.7%)  |
| Distant          | 83    | 3.2  | 3 | 65.6   | 13      | 78      | 3       | 2        | 0      | 68      | 29      |
|                  |       |      |   | (14)   | (15.7%) | (94%)   | (3.6%)  | (2.4%)   | (0%)   | (81.9%) | (34.9%) |
| Salivary gland   | 10992 | 11.3 | 6 | 59.6   | 5152    | 9207    | 854     | 869      | 62     | 9489    | 5613    |
|                  |       |      |   | (18.3) | (46.9%) | (83.8%) | (7.8%)  | (7.9%)   | (0.6%) | (86.3%) | (51.1%) |
| Local            | 7760  | 14.1 | 7 | 57.8   | 3666    | 6462    | 641     | 618      | 39     | 7277    | 4033    |
|                  |       |      |   | (18.6) | (47.2%) | (83.3%) | (8.3%)  | (8%)     | (0.5%) | (93.8%) | (52%)   |
| Distant          | 1078  | 1.8  | 1 | 64.2   | 350     | 897     | 83      | 96       | 2      | 787     | 746     |
|                  |       |      |   | (15.7) | (32.5%) | (83.2%) | (7.7%)  | (8.9%)   | (0.2%) | (73%)   | (69.2%) |

|                                 |        |      |   |                |                  |                   |                  |                 |               |                  |                  |
|---------------------------------|--------|------|---|----------------|------------------|-------------------|------------------|-----------------|---------------|------------------|------------------|
| Peritoneum,<br>Retroperitoneum  | 7524   | 2.8  | 2 | 58.1<br>(20.5) | 4820<br>(64.1%)  | 6361<br>(84.5%)   | 587<br>(7.8%)    | 566<br>(7.5%)   | 10<br>(0.1%)  | 5082<br>(67.5%)  | 1249<br>(16.6%)  |
| Local                           | 3166   | 5.6  | 3 | 56.4<br>(20.7) | 1968<br>(62.2%)  | 2624<br>(82.9%)   | 277<br>(8.7%)    | 259<br>(8.2%)   | 6<br>(0.2%)   | 2644<br>(83.5%)  | 678<br>(21.4%)   |
| Distant                         | 2915   | 1.8  | 2 | 58.4<br>(21.2) | 2108<br>(72.3%)  | 2478<br>(85%)     | 219<br>(7.5%)    | 217<br>(7.4%)   | 1<br>(0%)     | 1877<br>(64.4%)  | 335<br>(11.5%)   |
| Appendix                        | 4264   | 10.5 | 4 | 54.6<br>(16.9) | 2204<br>(51.7%)  | 3583<br>(84%)     | 368<br>(8.6%)    | 291<br>(6.8%)   | 22<br>(0.5%)  | 4047<br>(94.9%)  | 161<br>(3.8%)    |
| Local                           | 2819   | 19.9 | 6 | 53.3<br>(17.8) | 1407<br>(49.9%)  | 2387<br>(84.7%)   | 253<br>(9%)      | 160<br>(5.7%)   | 19<br>(0.7%)  | 2800<br>(99.3%)  | 85<br>(3%)       |
| Distant                         | 1273   | 2.2  | 2 | 58<br>(13.7)   | 731<br>(57.4%)   | 1047<br>(82.2%)   | 104<br>(8.2%)    | 119<br>(9.3%)   | 3<br>(0.2%)   | 1103<br>(86.6%)  | 72<br>(5.7%)     |
| Intrahepatic bile<br>duct       | 3960   | 0.5  | 0 | 67.2<br>(13.5) | 1915<br>(48.4%)  | 3048<br>(77%)     | 235<br>(5.9%)    | 673<br>(17%)    | 4<br>(0.1%)   | 644<br>(16.3%)   | 787<br>(19.9%)   |
| Local                           | 1888   | 0.8  | 1 | 65.9<br>(13.2) | 921<br>(48.8%)   | 1440<br>(76.3%)   | 120<br>(6.4%)    | 328<br>(17.4%)  | 0<br>(0%)     | 473<br>(25.1%)   | 454<br>(24%)     |
| Distant                         | 1215   | 0.3  | 0 | 64.4<br>(13.1) | 575<br>(47.3%)   | 921<br>(75.8%)    | 82<br>(6.7%)     | 211<br>(17.4%)  | 1<br>(0.1%)   | 138<br>(11.4%)   | 206<br>(17%)     |
| Unspecified<br>digestive organs | 2675   | 0.4  | 0 | 67.2<br>(14.8) | 1402<br>(52.4%)  | 2154<br>(80.5%)   | 290<br>(10.8%)   | 230<br>(8.6%)   | 1<br>(0%)     | 393<br>(14.7%)   | 252<br>(9.4%)    |
| Local                           | 159    | 1.2  | 1 | 66.5<br>(12.5) | 79<br>(49.7%)    | 129<br>(81.1%)    | 17<br>(10.7%)    | 13<br>(8.2%)    | 0<br>(0%)     | 76<br>(47.8%)    | 16<br>(10.1%)    |
| Distant                         | 1829   | 0.3  | 0 | 66.3<br>(13.5) | 966<br>(52.8%)   | 1459<br>(79.8%)   | 214<br>(11.7%)   | 155<br>(8.5%)   | 1<br>(0.1%)   | 215<br>(11.8%)   | 209<br>(11.4%)   |
| <b>Respiratory System</b>       |        |      |   |                |                  |                   |                  |                 |               |                  |                  |
| Lung and Bronchus               | 190488 | 0.8  | 1 | 66<br>(11.3)   | 73742<br>(38.7%) | 153457<br>(80.6%) | 24226<br>(12.7%) | 12681<br>(6.7%) | 124<br>(0.1%) | 52773<br>(27.7%) | 92632<br>(48.6%) |
| Local                           | 52080  | 2    | 2 | 67.4<br>(10.8) | 23950<br>(46%)   | 41295<br>(79.3%)  | 6578<br>(12.6%)  | 4178<br>(8%)    | 29<br>(0.1%)  | 26390<br>(50.7%) | 22232<br>(42.7%) |
| Distant                         | 56136  | 0.5  | 0 | 66.5<br>(11.4) | 24544<br>(43.7%) | 42511<br>(75.7%)  | 8610<br>(15.3%)  | 4997<br>(8.9%)  | 18<br>(0%)    | 4737<br>(8.4%)   | 28788<br>(51.3%) |
| Larynx                          | 36419  | 7.1  | 5 | 63<br>(11.1)   | 6718<br>(18.4%)  | 30322<br>(83.3%)  | 4644<br>(12.8%)  | 1353<br>(3.7%)  | 100<br>(0.3%) | 19342<br>(53.1%) | 25982<br>(71.3%) |
| Local                           | 25322  | 7.8  | 8 | 62.8<br>(10.9) | 4605<br>(18.2%)  | 21431<br>(84.6%)  | 3015<br>(11.9%)  | 830<br>(3.3%)   | 46<br>(0.2%)  | 14502<br>(57.3%) | 17912<br>(70.7%) |
| Distant                         | 1721   | 1.4  | 1 | 62.2<br>(10.5) | 305<br>(17.7%)   | 1355<br>(78.7%)   | 312<br>(18.1%)   | 54<br>(3.1%)    | 0<br>(0%)     | 1074<br>(62.4%)  | 1224<br>(71.1%)  |
| Oropharynx                      | 15784  | 5.2  | 3 | 58.9<br>(12.2) | 4030<br>(25.5%)  | 13034<br>(82.6%)  | 1962<br>(12.4%)  | 741<br>(4.7%)   | 47<br>(0.3%)  | 7599<br>(48.1%)  | 12334<br>(78.1%) |
| Local                           | 11069  | 6.1  | 4 | 58.8<br>(10.9) | 2629<br>(23.8%)  | 9312<br>(84.1%)   | 1327<br>(12%)    | 402<br>(3.6%)   | 28<br>(0.3%)  | 5713<br>(51.6%)  | 9218<br>(83.3%)  |
| Distant                         | 2411   | 1.7  | 1 | 59.5<br>(10.9) | 536<br>(22.2%)   | 1876<br>(77.8%)   | 428<br>(17.8%)   | 101<br>(4.2%)   | 6<br>(0.2%)   | 887<br>(36.8%)   | 1945<br>(80.7%)  |

|                                 |      |      |    |                |                 |                 |                 |                 |              |                 |                 |
|---------------------------------|------|------|----|----------------|-----------------|-----------------|-----------------|-----------------|--------------|-----------------|-----------------|
| Hypopharynx                     | 7037 | 1.6  | 2  | 63<br>(10.6)   | 1529<br>(21.7%) | 5496<br>(78.1%) | 1113<br>(15.8%) | 425<br>(6%)     | 3<br>(0%)    | 3097<br>(44%)   | 5565<br>(79.1%) |
| Local                           | 5185 | 1.9  | 2  | 63.3<br>(10.5) | 1126<br>(21.7%) | 4064<br>(78.4%) | 810<br>(15.6%)  | 310<br>(6%)     | 1<br>(0%)    | 2460<br>(47.4%) | 4195<br>(80.9%) |
| Distant                         | 1499 | 1    | 1  | 62.1<br>(10.3) | 317<br>(21.1%)  | 1132<br>(75.5%) | 263<br>(17.5%)  | 102<br>(6.8%)   | 2<br>(0.1%)  | 545<br>(36.4%)  | 1160<br>(77.4%) |
| Nasopharynx                     | 6614 | 5.7  | 4  | 53.5<br>(16.8) | 2045<br>(30.9%) | 3444<br>(52.1%) | 616<br>(9.3%)   | 2533<br>(38.3%) | 21<br>(0.3%) | 1199<br>(18.1%) | 5510<br>(83.3%) |
| Local                           | 3169 | 6.2  | 6  | 52.7<br>(16)   | 972<br>(30.7%)  | 1595<br>(50.3%) | 266<br>(8.4%)   | 1299<br>(41%)   | 9<br>(0.3%)  | 657<br>(20.7%)  | 2879<br>(90.8%) |
| Distant                         | 748  | 2    | 2  | 53<br>(17)     | 206<br>(27.5%)  | 426<br>(57%)    | 84<br>(11.2%)   | 236<br>(31.6%)  | 2<br>(0.3%)  | 161<br>(21.5%)  | 627<br>(83.8%)  |
| Pleura                          | 6016 | 0.8  | 1  | 68.7<br>(11.9) | 1219<br>(20.3%) | 5491<br>(91.3%) | 262<br>(4.4%)   | 256<br>(4.3%)   | 7<br>(0.1%)  | 1424<br>(23.7%) | 1112<br>(18.5%) |
| Local                           | 1352 | 0.8  | 1  | 66.8<br>(11.3) | 245<br>(18.1%)  | 1246<br>(92.2%) | 48<br>(3.6%)    | 58<br>(4.3%)    | 0<br>(0%)    | 459<br>(33.9%)  | 320<br>(23.7%)  |
| Distant                         | 2066 | 0.7  | 1  | 67.9<br>(11.4) | 379<br>(18.3%)  | 1883<br>(91.1%) | 102<br>(4.9%)   | 77<br>(3.7%)    | 4<br>(0.2%)  | 425<br>(20.6%)  | 426<br>(20.6%)  |
| Middle ear<br>accessory sinuses | 3795 | 3    | 2  | 60<br>(17.9)   | 1579<br>(41.6%) | 2949<br>(77.7%) | 400<br>(10.5%)  | 432<br>(11.4%)  | 14<br>(0.4%) | 2257<br>(59.5%) | 2673<br>(70.4%) |
| Local                           | 1957 | 3.9  | 3  | 59.3<br>(17.6) | 813<br>(41.5%)  | 1480<br>(75.6%) | 217<br>(11.1%)  | 251<br>(12.8%)  | 9<br>(0.5%)  | 1381<br>(70.6%) | 1422<br>(72.7%) |
| Distant                         | 399  | 1.2  | 1  | 59.1<br>(18.9) | 173<br>(43.4%)  | 304<br>(76.2%)  | 51<br>(12.8%)   | 43<br>(10.8%)   | 1<br>(0.3%)  | 196<br>(49.1%)  | 301<br>(75.4%)  |
| Nasal Cavity                    | 2977 | 8.4  | 5  | 61.6<br>(16.9) | 1222<br>(41%)   | 2470<br>(83%)   | 195<br>(6.6%)   | 286<br>(9.6%)   | 26<br>(0.9%) | 2136<br>(71.8%) | 1574<br>(52.9%) |
| Local                           | 1550 | 10.2 | 6  | 62.3<br>(16.1) | 646<br>(41.7%)  | 1328<br>(85.7%) | 101<br>(6.5%)   | 111<br>(7.2%)   | 10<br>(0.6%) | 1320<br>(85.2%) | 743<br>(47.9%)  |
| Distant                         | 390  | 5.3  | 2  | 58.6<br>(17.3) | 140<br>(35.9%)  | 292<br>(74.9%)  | 48<br>(12.3%)   | 48<br>(12.3%)   | 2<br>(0.5%)  | 261<br>(66.9%)  | 304<br>(77.9%)  |
| Pharynx                         | 2473 | 1.8  | 2  | 62<br>(13.1)   | 748<br>(30.2%)  | 2007<br>(81.2%) | 365<br>(14.8%)  | 92<br>(3.7%)    | 9<br>(0.4%)  | 840<br>(34%)    | 1719<br>(69.5%) |
| Local                           | 1536 | 2.1  | 2  | 62.1<br>(11.6) | 462<br>(30.1%)  | 1261<br>(82.1%) | 235<br>(15.3%)  | 39<br>(2.5%)    | 1<br>(0.1%)  | 610<br>(39.7%)  | 1162<br>(75.7%) |
| Distant                         | 359  | 0.8  | 1  | 62.1<br>(11.6) | 105<br>(29.2%)  | 276<br>(76.9%)  | 67<br>(18.7%)   | 16<br>(4.5%)    | 0<br>(0%)    | 103<br>(28.7%)  | 248<br>(69.1%)  |
| Mediastinum                     | 1824 | 17.1 | 4  | 33.7<br>(22)   | 644<br>(35.3%)  | 1473<br>(80.8%) | 157<br>(8.6%)   | 189<br>(10.4%)  | 5<br>(0.3%)  | 727<br>(39.9%)  | 725<br>(39.7%)  |
| Local                           | 535  | 22.7 | 11 | 28.2<br>(22.6) | 154<br>(28.8%)  | 443<br>(82.8%)  | 40<br>(7.5%)    | 52<br>(9.7%)    | 0<br>(0%)    | 341<br>(63.7%)  | 187<br>(35%)    |
| Distant                         | 269  | 1.3  | 1  | 32.4<br>(23.4) | 61<br>(22.7%)   | 218<br>(81%)    | 23<br>(8.6%)    | 28<br>(10.4%)   | 0<br>(0%)    | 108<br>(40.1%)  | 119<br>(44.2%)  |
| Trachea                         | 514  | 1.5  | 1  | 60.2           | 211             | 421             | 57              | 34              | 2            | 209             | 377             |

|                                       |        |      |    |        |         |         |         |         |        |         |         |
|---------------------------------------|--------|------|----|--------|---------|---------|---------|---------|--------|---------|---------|
|                                       |        |      |    | (15.3) | (41.1%) | (81.9%) | (11.1%) | (6.6%)  | (0.4%) | (40.7%) | (73.3%) |
| Local                                 | 255    | 1.7  | 2  | 58.8   | 110     | 208     | 28      | 18      | 1      | 128     | 196     |
|                                       |        |      |    | (15.6) | (43.1%) | (81.6%) | (11%)   | (7.1%)  | (0.4%) | (50.2%) | (76.9%) |
| Distant                               | 71     | 0.4  | 0  | 64     | 30      | 64      | 5       | 2       | 0      | 15      | 61      |
|                                       |        |      |    | (12.5) | (42.3%) | (90.1%) | (7%)    | (2.8%)  | (0%)   | (21.1%) | (85.9%) |
| <b>Bones and Joints, soft tissues</b> |        |      |    |        |         |         |         |         |        |         |         |
| Breast                                | 188751 | 14.7 | 9  | 60.6   | 187328  | 163802  | 22307   | 2098    | 544    | 176824  | 68451   |
|                                       |        |      |    | (14.2) | (99.2%) | (86.8%) | (11.8%) | (1.1%)  | (0.3%) | (93.7%) | (36.3%) |
| Local                                 | 171618 | 16.1 | 10 | 60.3   | 170387  | 149508  | 19809   | 1843    | 458    | 167034  | 62962   |
|                                       |        |      |    | (14)   | (99.3%) | (87.1%) | (11.5%) | (1.1%)  | (0.3%) | (97.3%) | (36.7%) |
| Distant                               | 10111  | 1.8  | 2  | 62.9   | 10007   | 8319    | 1679    | 95      | 18     | 5909    | 3904    |
|                                       |        |      |    | (14.2) | (99%)   | (82.3%) | (16.6%) | (0.9%)  | (0.2%) | (58.4%) | (38.6%) |
| Skin                                  | 113139 | 21.2 | 8  | 57     | 50667   | 105179  | 2384    | 2384    | 3192   | 99112   | 5634    |
|                                       |        |      |    | (17.4) | (44.8%) | (93%)   | (2.1%)  | (2.1%)  | (2.8%) | (87.6%) | (5%)    |
| Local                                 | 94413  | 23.8 | 8  | 57.1   | 43812   | 89347   | 783     | 1518    | 2765   | 90872   | 1228    |
|                                       |        |      |    | (17.2) | (46.4%) | (94.6%) | (0.8%)  | (1.6%)  | (2.9%) | (96.2%) | (1.3%)  |
| Distant                               | 2702   | 0.8  | 1  | 60.6   | 979     | 2548    | 70      | 79      | 5      | 1554    | 889     |
|                                       |        |      |    | (16.7) | (36.2%) | (94.3%) | (2.6%)  | (2.9%)  | (0.2%) | (57.5%) | (32.9%) |
| Bones, joints                         | 10331  | 12.6 | 5  | 42.1   | 4370    | 8620    | 947     | 706     | 58     | 6570    | 3664    |
|                                       |        |      |    | (23.8) | (42.3%) | (83.4%) | (9.2%)  | (6.8%)  | (0.6%) | (63.6%) | (35.5%) |
| Local                                 | 5781   | 21.8 | 7  | 37.2   | 2538    | 4808    | 522     | 420     | 31     | 4887    | 1193    |
|                                       |        |      |    | (22.1) | (43.9%) | (83.2%) | (9%)    | (7.3%)  | (0.5%) | (84.5%) | (20.6%) |
| Distant                               | 2334   | 3.2  | 2  | 48.2   | 868     | 1934    | 248     | 148     | 4      | 969     | 1434    |
|                                       |        |      |    | (23.9) | (37.2%) | (82.9%) | (10.6%) | (6.3%)  | (0.2%) | (41.5%) | (61.4%) |
| Connective Soft Tissue                | 24186  | 9.8  | 5  | 51.6   | 10911   | 19618   | 2527    | 1892    | 149    | 19346   | 9942    |
|                                       |        |      |    | (23.2) | (45.1%) | (81.1%) | (10.4%) | (7.8%)  | (0.6%) | (80%)   | (41.1%) |
| Local                                 | 17130  | 14.8 | 6  | 51.1   | 7653    | 13844   | 1811    | 1379    | 96     | 15936   | 7208    |
|                                       |        |      |    | (22.8) | (44.7%) | (80.8%) | (10.6%) | (8.1%)  | (0.6%) | (93%)   | (42.1%) |
| Distant                               | 3163   | 1    | 1  | 47.6   | 1427    | 2475    | 416     | 267     | 5      | 1590    | 1302    |
|                                       |        |      |    | (25.6) | (45.1%) | (78.2%) | (13.2%) | (8.4%)  | (0.2%) | (50.3%) | (41.2%) |
| Heart                                 | 239    | 1.2  | 1  | 47.7   | 112     | 182     | 27      | NA      | 0      | 124     | 70      |
|                                       |        |      |    | (19.7) | (46.9%) | (NA%)   | (NA%)   | (NA%)   | (NA%)  | (51.9%) | (29.3%) |
| Local                                 | 105    | 1.2  | 1  | 44.4   | 52      | 78      | 12      | 15      | 0      | 84      | 30      |
|                                       |        |      |    | (18.8) | (49.5%) | (74.3%) | (11.4%) | (14.3%) | (0%)   | (80%)   | (28.6%) |
| Distant                               | 65     | 0.6  | 0  | 41.1   | 30      | 49      | 11      | 5       | 0      | 26      | 24      |
|                                       |        |      |    | (16.3) | (46.2%) | (75.4%) | (16.9%) | (7.7%)  | (0%)   | (40%)   | (36.9%) |
| <b>Female Genital System</b>          |        |      |    |        |         |         |         |         |        |         |         |
| Cervix                                | 123836 | 40.8 | 21 | 38.3   | 123836  | 97262   | 14589   | 7461    | 4524   | 100919  | 18263   |
|                                       |        |      |    | (14.9) | (100%)  | (78.5%) | (11.8%) | (6%)    | (3.7%) | (81.5%) | (14.7%) |
| Local                                 | 118625 | NA   | 22 | 37.5   | 118625  | 93412   | 13688   | 7074    | 4451   | 99640   | 15165   |
|                                       |        |      |    | (14.3) | (100%)  | (78.7%) | (11.5%) | (6%)    | (3.8%) | (84%)   | (12.8%) |
| Distant                               | 2911   | 0.8  | 1  | 57.3   | 2911    | 2160    | 500     | 247     | 4      | 704     | 2193    |
|                                       |        |      |    | (15.3) | (100%)  | (74.2%) | (17.2%) | (8.5%)  | (0.1%) | (24.2%) | (75.3%) |

|                          |       |      |    |                |                 |                  |                |                |               |                  |                  |
|--------------------------|-------|------|----|----------------|-----------------|------------------|----------------|----------------|---------------|------------------|------------------|
| Uterus                   | 75885 | 17.3 | 9  | 62.4<br>(12.2) | 75885<br>(100%) | 66171<br>(87.2%) | 4451<br>(5.9%) | 4968<br>(6.5%) | 295<br>(0.4%) | 68064<br>(89.7%) | 27759<br>(36.6%) |
| Local                    | 66816 | 18.8 | 10 | 62<br>(12)     | 66816<br>(100%) | 58633<br>(87.8%) | 3482<br>(5.2%) | 4468<br>(6.7%) | 233<br>(0.3%) | 62449<br>(93.5%) | 24206<br>(36.2%) |
| Distant                  | 5664  | 1.4  | 1  | 65.1<br>(12.1) | 5664<br>(100%)  | 4601<br>(81.2%)  | 668<br>(11.8%) | 391<br>(6.9%)  | 4<br>(0.1%)   | 4316<br>(76.2%)  | 2414<br>(42.6%)  |
| Ovary                    | 63542 | 3.8  | 3  | 59.3<br>(16.2) | 63542<br>(100%) | 54804<br>(86.2%) | 4209<br>(6.6%) | 4359<br>(6.9%) | 170<br>(0.3%) | 52378<br>(82.4%) | 3665<br>(5.8%)   |
| Local                    | 21118 | 22.8 | 11 | 52.7<br>(16.9) | 21118<br>(100%) | 17872<br>(84.6%) | 1382<br>(6.5%) | 1771<br>(8.4%) | 93<br>(0.4%)  | 20603<br>(97.6%) | 1364<br>(6.5%)   |
| Distant                  | 39164 | 2    | 2  | 62.3<br>(14.3) | 39164<br>(100%) | 34129<br>(87.1%) | 2561<br>(6.5%) | 2427<br>(6.2%) | 47<br>(0.1%)  | 30474<br>(77.8%) | 2106<br>(5.4%)   |
| Vulva                    | 18994 | 20.4 | 9  | 54.5<br>(18.6) | 18994<br>(100%) | 15962<br>(84%)   | 1749<br>(9.2%) | 737<br>(3.9%)  | 546<br>(2.9%) | 16280<br>(85.7%) | 1271<br>(6.7%)   |
| Local                    | 18140 | 21.3 | 9  | 53.8<br>(18.3) | 18140<br>(100%) | 15220<br>(83.9%) | 1688<br>(9.3%) | 705<br>(3.9%)  | 527<br>(2.9%) | 15881<br>(87.5%) | 1042<br>(5.7%)   |
| Distant                  | 281   | 0.6  | 1  | 70.6<br>(14.8) | 281<br>(100%)   | 243<br>(86.5%)   | 25<br>(8.9%)   | 12<br>(4.3%)   | 1<br>(0.4%)   | 130<br>(46.3%)   | 169<br>(60.1%)   |
| Vagina, labia            | 8794  | 15.2 | 7  | 58.1<br>(18.6) | 8794<br>(100%)  | 7243<br>(82.4%)  | 952<br>(10.8%) | 417<br>(4.7%)  | 182<br>(2.1%) | 6233<br>(70.9%)  | 2105<br>(23.9%)  |
| Local                    | 6203  | 17.2 | 10 | 57.5<br>(18.6) | 6203<br>(100%)  | 5195<br>(83.7%)  | 648<br>(10.4%) | 242<br>(3.9%)  | 118<br>(1.9%) | 4975<br>(80.2%)  | 1129<br>(18.2%)  |
| Distant                  | 452   | 1.2  | 1  | 65.5<br>(16.7) | 452<br>(100%)   | 353<br>(78.1%)   | 72<br>(15.9%)  | 27<br>(6%)     | 0<br>(0%)     | 147<br>(32.5%)   | 334<br>(73.9%)   |
| Other female<br>genitals | 3060  | 5.1  | 3  | 62.4<br>(14)   | 3060<br>(100%)  | 2581<br>(84.3%)  | 238<br>(7.8%)  | 226<br>(7.4%)  | 15<br>(0.5%)  | 2600<br>(85%)    | 361<br>(11.8%)   |
| Local                    | 1377  | 13.4 | 6  | 59.4<br>(14.5) | 1377<br>(100%)  | 1150<br>(83.5%)  | 116<br>(8.4%)  | 105<br>(7.6%)  | 6<br>(0.4%)   | 1309<br>(95.1%)  | 180<br>(13.1%)   |
| Distant                  | 1427  | 2.4  | 2  | 64.7<br>(12.2) | 1427<br>(100%)  | 1222<br>(85.6%)  | 95<br>(6.7%)   | 107<br>(7.5%)  | 3<br>(0.2%)   | 1208<br>(84.7%)  | 142<br>(10%)     |
| Uterus NOS               | 1903  | 1.7  | 1  | 62.5<br>(16.6) | 1903<br>(100%)  | 1410<br>(74.1%)  | 355<br>(18.7%) | 125<br>(6.6%)  | 13<br>(0.7%)  | 1173<br>(61.6%)  | 426<br>(22.4%)   |
| Local                    | 600   | 3.9  | 2  | 59.8<br>(15)   | 600<br>(100%)   | 435<br>(72.5%)   | 115<br>(19.2%) | 45<br>(7.5%)   | 5<br>(0.8%)   | 511<br>(85.2%)   | 160<br>(26.7%)   |
| Distant                  | 654   | 0.5  | 0  | 63.4<br>(14.5) | 654<br>(100%)   | 449<br>(68.7%)   | 147<br>(22.5%) | 57<br>(8.7%)   | 1<br>(0.2%)   | 352<br>(53.8%)   | 154<br>(23.5%)   |
| Placenta                 | 573   | -    | 17 | 29<br>(8.5)    | 573<br>(100%)   | 361<br>(63%)     | 100<br>(17.5%) | 109<br>(19%)   | 3<br>(0.5%)   | 277<br>(48.3%)   | 41<br>(7.2%)     |
| Local                    | 220   | -    | 18 | 28.6<br>(8.4)  | 220<br>(100%)   | 136<br>(61.8%)   | 38<br>(17.3%)  | 46<br>(20.9%)  | 0<br>(0%)     | 137<br>(62.3%)   | 1<br>(0.5%)      |
| Distant                  | 293   | -    | 15 | 29.7<br>(8.7)  | 293<br>(100%)   | 190<br>(64.8%)   | 47<br>(16%)    | 53<br>(18.1%)  | 3<br>(1%)     | 122<br>(41.6%)   | 39<br>(13.3%)    |

#### Male Genital System

© 2018 American Medical Association. All rights reserved.

|                               |        |      |    |                |                  |                   |                  |                 |                |                   |                  |
|-------------------------------|--------|------|----|----------------|------------------|-------------------|------------------|-----------------|----------------|-------------------|------------------|
| Prostate                      | 206889 | 9.9  | 6  | 69.1<br>(9.7)  | 0<br>(0%)        | 156909<br>(75.8%) | 33755<br>(16.3%) | 14652<br>(7.1%) | 1573<br>(0.8%) | 99250<br>(48%)    | 69813<br>(33.7%) |
| Local                         | 110187 | 14.7 | 7  | 66.7<br>(9.5)  | 0<br>(0%)        | 79745<br>(72.4%)  | 20152<br>(18.3%) | 8982<br>(8.2%)  | 1308<br>(1.2%) | 44796<br>(40.7%)  | 43274<br>(39.3%) |
| Distant                       | 5005   | 2.1  | 2  | 72.1<br>(11.1) | 0<br>(0%)        | 3219<br>(64.3%)   | 1168<br>(23.3%)  | 606<br>(12.1%)  | 12<br>(0.2%)   | 676<br>(13.5%)    | 1196<br>(23.9%)  |
| Testis                        | 26112  | 40   | 13 | 35<br>(12.7)   | 0<br>(0%)        | 23963<br>(91.8%)  | 649<br>(2.5%)    | 1301<br>(5%)    | 199<br>(0.8%)  | 25432<br>(97.4%)  | 9906<br>(37.9%)  |
| Local                         | 22044  | NA   | 14 | 34.3<br>(11.3) | 0<br>(0%)        | 20308<br>(92.1%)  | 515<br>(2.3%)    | 1045<br>(4.7%)  | 176<br>(0.8%)  | 21914<br>(99.4%)  | 9063<br>(41.1%)  |
| Distant                       | 2848   | 27.8 | 7  | 32.8<br>(12)   | 0<br>(0%)        | 2576<br>(90.4%)   | 94<br>(3.3%)     | 173<br>(6.1%)   | 5<br>(0.2%)    | 2505<br>(88%)     | 421<br>(14.8%)   |
| Penis, scrotum                | 5558   | 10.9 | 6  | 61.6<br>(16.1) | 0<br>(0%)        | 4628<br>(83.3%)   | 492<br>(8.9%)    | 323<br>(5.8%)   | 115<br>(2.1%)  | 4832<br>(86.9%)   | 402<br>(7.2%)    |
| Local                         | 5075   | 11.8 | 7  | 61.9<br>(15.9) | 0<br>(0%)        | 4244<br>(83.6%)   | 443<br>(8.7%)    | 284<br>(5.6%)   | 104<br>(2%)    | 4562<br>(89.9%)   | 278<br>(5.5%)    |
| Distant                       | 126    | 0.8  | 1  | 62.2<br>(15.1) | 0<br>(0%)        | 98<br>(77.8%)     | 18<br>(14.3%)    | 10<br>(7.9%)    | 0<br>(0%)      | 100<br>(79.4%)    | 46<br>(36.5%)    |
| Epididymis,<br>spermatic cord | 452    | 12.3 | 7  | 57.1<br>(21.3) | 0<br>(0%)        | 380<br>(84.1%)    | 35<br>(7.7%)     | 32<br>(7.1%)    | 5<br>(1.1%)    | 416<br>(92%)      | 83<br>(18.4%)    |
| Local                         | 364    | 15.8 | 8  | 56.7<br>(20.8) | 0<br>(0%)        | 305<br>(83.8%)    | 28<br>(7.7%)     | 26<br>(7.1%)    | 5<br>(1.4%)    | 358<br>(98.4%)    | 60<br>(16.5%)    |
| Distant                       | 34     | 2.2  | 1  | 55.4<br>(26.5) | 0<br>(0%)        | 28<br>(82.4%)     | 4<br>(11.8%)     | 2<br>(5.9%)     | 0<br>(0%)      | 26<br>(76.5%)     | 13<br>(38.2%)    |
| <b>Urinary System</b>         |        |      |    |                |                  |                   |                  |                 |                |                   |                  |
| Bladder                       | 129717 | 8.3  | 6  | 68.7<br>(12.6) | 32601<br>(25.1%) | 118847<br>(91.6%) | 5064<br>(3.9%)   | 5153<br>(4%)    | 653<br>(0.5%)  | 121548<br>(93.7%) | 10220<br>(7.9%)  |
| Local                         | 120384 | 8.9  | 6  | 68.6<br>(12.5) | 29616<br>(24.6%) | 110683<br>(91.9%) | 4386<br>(3.6%)   | 4755<br>(3.9%)  | 560<br>(0.5%)  | 115692<br>(96.1%) | 8339<br>(6.9%)   |
| Distant                       | 3980   | 0.5  | 0  | 69.4<br>(12.2) | 1385<br>(34.8%)  | 3416<br>(85.8%)   | 338<br>(8.5%)    | 221<br>(5.6%)   | 5<br>(0.1%)    | 3000<br>(75.4%)   | 1306<br>(32.8%)  |
| Kidney                        | 77884  | 8.3  | 4  | 60.7<br>(16)   | 29144<br>(37.4%) | 64603<br>(82.9%)  | 7956<br>(10.2%)  | 5047<br>(6.5%)  | 278<br>(0.4%)  | 63059<br>(81%)    | 7403<br>(9.5%)   |
| Local                         | 58775  | 12.8 | 6  | 59.7<br>(15.7) | 22260<br>(37.9%) | 48491<br>(82.5%)  | 6148<br>(10.5%)  | 3896<br>(6.6%)  | 240<br>(0.4%)  | 55684<br>(94.7%)  | 1761<br>(3%)     |
| Distant                       | 15310  | 0.6  | 1  | 62.3<br>(16)   | 5306<br>(34.7%)  | 12934<br>(84.5%)  | 1397<br>(9.1%)   | 966<br>(6.3%)   | 13<br>(0.1%)   | 6349<br>(41.5%)   | 5385<br>(35.2%)  |
| Ureter, renal pelvis          | 11920  | 5.5  | 4  | 69.3<br>(11.9) | 4805<br>(40.3%)  | 10554<br>(88.5%)  | 502<br>(4.2%)    | 833<br>(7%)     | 31<br>(0.3%)   | 10556<br>(88.6%)  | 886<br>(7.4%)    |
| Local                         | 10253  | 7.1  | 5  | 69.1<br>(11.8) | 4057<br>(39.6%)  | 9119<br>(88.9%)   | 395<br>(3.9%)    | 710<br>(6.9%)   | 29<br>(0.3%)   | 9752<br>(95.1%)   | 565<br>(5.5%)    |
| Distant                       | 1125   | 0.5  | 0  | 69.9<br>(11.8) | 492<br>(43.7%)   | 966<br>(85.9%)    | 71<br>(6.3%)     | 88<br>(7.8%)    | 0<br>(0%)      | 651<br>(57.9%)    | 290<br>(25.8%)   |



|                                  |       |      |    |                |                  |                  |                |                |               |                  |                  |
|----------------------------------|-------|------|----|----------------|------------------|------------------|----------------|----------------|---------------|------------------|------------------|
| Other unspecified urinary organs | 2299  | 5.2  | 4  | 67.5<br>(14.3) | 790<br>(34.4%)   | 1830<br>(79.6%)  | 340<br>(14.8%) | 110<br>(4.8%)  | 19<br>(0.8%)  | 1427<br>(62.1%)  | 488<br>(21.2%)   |
| Local                            | 1527  | 6.4  | 4  | 67.3<br>(14.2) | 534<br>(35%)     | 1223<br>(80.1%)  | 224<br>(14.7%) | 74<br>(4.8%)   | 6<br>(0.4%)   | 1237<br>(81%)    | 357<br>(23.4%)   |
| Distant                          | 239   | 0.8  | 1  | 68.2<br>(12.1) | 91<br>(38.1%)    | 184<br>(77%)     | 40<br>(16.7%)  | 15<br>(6.3%)   | 0<br>(0%)     | 111<br>(46.4%)   | 80<br>(33.5%)    |
| <b>Brain, CNS, Spine</b>         |       |      |    |                |                  |                  |                |                |               |                  |                  |
| Brain, CNS, Spine                | 47291 | 1.1  | 1  | 51.1<br>(21.6) | 20491<br>(43.3%) | 42185<br>(89.2%) | 2486<br>(5.3%) | 2494<br>(5.3%) | 126<br>(0.3%) | 31619<br>(66.9%) | 31947<br>(67.6%) |
| Local                            | 0     | -    | -  | -              | -                | -                | -              | -              | -             | -                | -                |
| Distant                          | 20    | 2.6  | 3  | 59.9<br>(14.2) | 10<br>(50%)      | 14<br>(70%)      | 2<br>(10%)     | 3<br>(15%)     | 1<br>(5%)     | 14 (70%)         | 14 (70%)         |
| Cerebellum                       | 3365  | 30.9 | 8  | 21.6<br>(21.2) | 1455<br>(43.2%)  | 2792<br>(83%)    | 307<br>(9.1%)  | 252<br>(7.5%)  | 14<br>(0.4%)  | 3061<br>(91%)    | 1811<br>(53.8%)  |
| Local                            | 0     | -    | -  | -              | -                | -                | -              | -              | -             | -                | -                |
| Distant                          | 0     | -    | -  | -              | -                | -                | -              | -              | -             | -                | -                |
| Meninges                         | 1071  | 6.6  | 5  | 59<br>(17.5)   | 585<br>(54.6%)   | 824<br>(76.9%)   | 143<br>(13.4%) | 99<br>(9.2%)   | 5<br>(0.5%)   | 880<br>(82.2%)   | 448<br>(41.8%)   |
| Local                            | 0     | -    | -  | -              | -                | -                | -              | -              | -             | -                | -                |
| Distant                          | 2     | 1.3  | 1  | 24.5<br>(30.4) | 1<br>(50%)       | 0<br>(0%)        | 1<br>(50%)     | 1<br>(50%)     | 0<br>(0%)     | 1<br>(50%)       | 1<br>(50%)       |
| Ventricle                        | 1001  | 14.6 | 5  | 29.3<br>(23.8) | 433<br>(43.3%)   | 817<br>(81.6%)   | 89<br>(8.9%)   | 89<br>(8.9%)   | 6<br>(0.6%)   | 720<br>(71.9%)   | 527<br>(52.6%)   |
| Local                            | 0     | -    | -  | -              | -                | -                | -              | -              | -             | -                | -                |
| Distant                          | 1     | -    | 4  | 67<br>(-)      | 1<br>(100%)      | 0<br>(0%)        | 1<br>(100%)    | 0<br>(0%)      | 0<br>(0%)     | 1<br>(100%)      | 1<br>(100%)      |
| Other Nervous System             | 548   | 2.2  | 2  | 50.8<br>(22.2) | 234<br>(42.7%)   | 465<br>(84.9%)   | 57<br>(10.4%)  | 24<br>(4.4%)   | 2<br>(0.4%)   | 260<br>(47.4%)   | 308<br>(56.2%)   |
| Local                            | 0     | -    | -  | -              | -                | -                | -              | -              | -             | -                | -                |
| Distant                          | 11    | 5    | 5  | 58.1<br>(16.1) | 2<br>(18.2%)     | 9<br>(81.8%)     | 2<br>(18.2%)   | 0<br>(0%)      | 0<br>(0%)     | 10<br>(90.9%)    | 8<br>(72.7%)     |
| Pineal Gland                     | 502   | 26   | 7  | 21.3<br>(14.7) | 105<br>(20.9%)   | 364<br>(72.5%)   | 70<br>(13.9%)  | 67<br>(13.3%)  | 1<br>(0.2%)   | 257<br>(51.2%)   | 407<br>(81.1%)   |
| Local                            | 265   | 25.7 | 12 | 20.7<br>(14.2) | 47<br>(17.7%)    | 189<br>(71.3%)   | 38<br>(14.3%)  | 38<br>(14.3%)  | 0<br>(0%)     | 157<br>(59.2%)   | 221<br>(83.4%)   |
| Distant                          | 39    | 7.1  | 7  | 21.2<br>(15.5) | 11<br>(28.2%)    | 26<br>(66.7%)    | 6<br>(15.4%)   | 7<br>(17.9%)   | 0<br>(0%)     | 8<br>(20.5%)     | 34<br>(87.2%)    |
| Pituitary gland                  | 211   | 22.8 | 10 | 40.5<br>(22.9) | 114<br>(54%)     | 153<br>(72.5%)   | 25<br>(11.8%)  | 31<br>(14.7%)  | 2<br>(0.9%)   | 124<br>(58.8%)   | 107<br>(50.7%)   |
| Local                            | 104   | 29.2 | 14 | 35.8<br>(21.8) | 57<br>(54.8%)    | 81<br>(77.9%)    | 6<br>(5.8%)    | 16<br>(15.4%)  | 1<br>(1%)     | 75<br>(72.1%)    | 60<br>(57.7%)    |
| Distant                          | 7     | 3.3  | 3  | 45.3           | 3                | 4                | 1              | 2              | 0             | 5                | 2                |

|                         |       |      |    |        |         |          |         |         |        |         |         |
|-------------------------|-------|------|----|--------|---------|----------|---------|---------|--------|---------|---------|
|                         |       |      |    | (19.3) | (42.9%) | (57.1%)  | (14.3%) | (28.6%) | (0%)   | (71.4%) | (28.6%) |
| <b>Eye and Orbit</b>    |       |      |    |        |         |          |         |         |        |         |         |
| Orbit, lacrimal gland   | 7354  | 11.8 | 7  | 60.8   | 3252    | 6657     | 243     | 365     | 89     | 4383    | 2982    |
|                         |       |      |    | (17.3) | (44.2%) | (90.5%)  | (3.3%)  | (5%)    | (1.2%) | (59.6%) | (40.5%) |
| Local                   | 5058  | 11.5 | 7  | 60.4   | 2053    | 4732     | 98      | 173     | 55     | 3470    | 1653    |
|                         |       |      |    | (17.3) | (40.6%) | (93.6%)  | (1.9%)  | (3.4%)  | (1.1%) | (68.6%) | (32.7%) |
| Distant                 | 144   | 3.2  | 2  | 54.4   | 57      | 125      | 12      | 7       | 0      | 92      | 73      |
|                         |       |      |    | (22.7) | (39.6%) | (86.8%)  | (8.3%)  | (4.9%)  | (0%)   | (63.9%) | (50.7%) |
| Retina                  | 959   | NA   | 15 | 6.3    | 494     | 715      | 138     | 99      | 7      | 810     | 200     |
|                         |       |      |    | (17)   | (51.5%) | (74.6%)  | (14.4%) | (10.3%) | (0.7%) | (84.5%) | (20.9%) |
| Local                   | 784   | NA   | 16 | 4.6    | 400     | 580      | 118     | 81      | 5      | 701     | 139     |
|                         |       |      |    | (14.1) | (51%)   | (74%)    | (15.1%) | (10.3%) | (0.6%) | (89.4%) | (17.7%) |
| Distant                 | 57    | NA   | 13 | 4.9    | 32      | 42       | 7       | 8       | 0      | 47      | 25      |
|                         |       |      |    | (16)   | (56.1%) | (73.7%)  | (12.3%) | (14%)   | (0%)   | (82.5%) | (43.9%) |
| Eyeball                 | 804   | 12.8 | 9  | 57.7   | 393     | 779      | 8       | 12      | 5      | 588     | 193     |
|                         |       |      |    | (17.9) | (48.9%) | (96.9%)  | (1%)    | (1.5%)  | (0.6%) | (73.1%) | (24%)   |
| Local                   | 678   | 13.4 | 9  | 56.9   | 325     | 662      | 6       | 7       | 3      | 522     | 148     |
|                         |       |      |    | (18.2) | (47.9%) | (97.6%)  | (0.9%)  | (1%)    | (0.4%) | (77%)   | (21.8%) |
| Distant                 | 9     | 0.6  | 1  | 65.7   | 6       | 9 (100%) | 0       | 0       | 0      | 7       | 1       |
|                         |       |      |    | (17.5) | (66.7%) | (0%)     | (0%)    | (0%)    | (0%)   | (77.8%) | (11.1%) |
| Eye NOS                 | 597   | 7.6  | 6  | 59.6   | 290     | 556      | 11      | 18      | 12     | 305     | 162     |
|                         |       |      |    | (20.3) | (48.6%) | (93.1%)  | (1.8%)  | (3%)    | (2%)   | (51.1%) | (27.1%) |
| Local                   | 269   | 9.8  | 7  | 56     | 118     | 251      | 7       | 7       | 4      | 178     | 65      |
|                         |       |      |    | (21.8) | (43.9%) | (93.3%)  | (2.6%)  | (2.6%)  | (1.5%) | (66.2%) | (24.2%) |
| Distant                 | 20    | 0.9  | 1  | 65.3   | 9       | 19       | 0       | 0       | 1      | 6       | 3       |
|                         |       |      |    | (17.7) | (45%)   | (95%)    | (0%)    | (0%)    | (5%)   | (30%)   | (15%)   |
| <b>Endocrine System</b> |       |      |    |        |         |          |         |         |        |         |         |
| Thyroid gland           | 70078 | 37.9 | 9  | 46.9   | 53248   | 57517    | 4034    | 8017    | 510    | 67162   | 31735   |
|                         |       |      |    | (16)   | (76%)   | (82.1%)  | (5.8%)  | (11.4%) | (0.7%) | (95.8%) | (45.3%) |
| Local                   | 64251 | 39.2 | 9  | 46.1   | 49399   | 52779    | 3682    | 7373    | 417    | 63287   | 28724   |
|                         |       |      |    | (15.5) | (76.9%) | (82.1%)  | (5.7%)  | (11.5%) | (0.6%) | (98.5%) | (44.7%) |
| Distant                 | 3043  | 7.6  | 4  | 54.5   | 1806    | 2411     | 220     | 400     | 12     | 2364    | 2010    |
|                         |       |      |    | (19.8) | (59.3%) | (79.2%)  | (7.2%)  | (13.1%) | (0.4%) | (77.7%) | (66.1%) |
| Adrenal glands          | 2409  | 3.6  | 2  | 33.7   | 1160    | 1942     | 245     | 215     | 7      | 1669    | 522     |
|                         |       |      |    | (29)   | (48.2%) | (80.6%)  | (10.2%) | (8.9%)  | (0.3%) | (69.3%) | (21.7%) |
| Local                   | 689   | 11.4 | 10 | 38.4   | 353     | 598      | 52      | 38      | 1      | 645     | 84      |
|                         |       |      |    | (26.5) | (51.2%) | (86.8%)  | (7.5%)  | (5.5%)  | (0.1%) | (93.6%) | (12.2%) |
| Distant                 | 826   | 1.2  | 1  | 26.1   | 375     | 659      | 79      | 85      | 3      | 439     | 250     |
|                         |       |      |    | (28.5) | (45.4%) | (79.8%)  | (9.6%)  | (10.3%) | (0.4%) | (53.1%) | (30.3%) |
| Thymus                  | 2184  | 8.9  | 5  | 53.8   | 985     | 1511     | 300     | 366     | 7      | 1501    | 1291    |
|                         |       |      |    | (16.7) | (45.1%) | (69.2%)  | (13.7%) | (16.8%) | (0.3%) | (68.7%) | (59.1%) |
| Local                   | 797   | 10   | 10 | 54.5   | 331     | 539      | 103     | 154     | 1      | 633     | 534     |
|                         |       |      |    | (15.6) | (41.5%) | (67.6%)  | (12.9%) | (19.3%) | (0.1%) | (79.4%) | (67%)   |

|                    |                |         |      |    |                |                    |                    |                  |                  |                 |                    |                   |
|--------------------|----------------|---------|------|----|----------------|--------------------|--------------------|------------------|------------------|-----------------|--------------------|-------------------|
|                    | Distant        | 256     | 2.8  | 3  | 51.4<br>(17.2) | 117<br>(45.7%)     | 181<br>(70.7%)     | 41<br>(16%)      | 34<br>(13.3%)    | 0<br>(0%)       | 142<br>(55.5%)     | 160<br>(62.5%)    |
| Spleen             |                | 1588    | 8.5  | 4  | 64<br>(14.6)   | 818<br>(51.5%)     | 1425<br>(89.7%)    | 86<br>(5.4%)     | 71<br>(4.5%)     | 6<br>(0.4%)     | 943<br>(59.4%)     | 66<br>(4.2%)      |
|                    | Local          | 0       | -    | -  | -              | -                  | -                  | -                | -                | -               | -                  | -                 |
|                    | Distant        | 4       | -    | 10 | 58.5<br>(18.6) | 0<br>(0%)          | 4<br>(100%)        | 0<br>(0%)        | 0<br>(0%)        | 0<br>(0%)       | 3<br>(75%)         | 0<br>(0%)         |
| Parathyroid gland  |                | 243     | 17.5 | 8  | 53.9<br>(14.7) | 124<br>(51%)       | 177<br>(NA%)       | 44<br>(NA%)      | NA<br>(NA%)      | 0<br>(NA%)      | 231<br>(95.1%)     | 24<br>(9.9%)      |
|                    | Local          | 135     | 19.2 | 13 | 53.2<br>(13.2) | 75<br>(55.6%)      | 99<br>(73.3%)      | 22<br>(16.3%)    | 14<br>(10.4%)    | 0<br>(0%)       | 133<br>(98.5%)     | 13<br>(9.6%)      |
|                    | Distant        | 13      | 2.5  | 2  | 62.7<br>(16.3) | 6<br>(46.2%)       | 12<br>(92.3%)      | 1<br>(7.7%)      | 0<br>(0%)        | 0<br>(0%)       | 10<br>(76.9%)      | 4<br>(30.8%)      |
| <b>Other</b>       |                |         |      |    |                |                    |                    |                  |                  |                 |                    |                   |
| Ill-defined        |                | 1986    | 1.2  | 1  | 63.3<br>(20.4) | 966<br>(48.6%)     | 1732<br>(87.2%)    | 126<br>(6.3%)    | 121<br>(6.1%)    | 7<br>(0.4%)     | 447<br>(22.5%)     | 737<br>(37.1%)    |
|                    | Local          | 0       | -    | -  | -              | -                  | -                  | -                | -                | -               | -                  | -                 |
|                    | Distant        | 10      | 5.3  | 5  | 63.7<br>(11.3) | 4<br>(40%)         | 8<br>(80%)         | 1<br>(10%)       | 1<br>(10%)       | 0<br>(0%)       | 1<br>(10%)         | 7<br>(70%)        |
| <b>All Cancers</b> |                | 2317185 | 7.1  | 4  | 60.9<br>(17.3) | 1153342<br>(49.8%) | 1933332<br>(83.4%) | 218774<br>(9.4%) | 148332<br>(6.4%) | 16747<br>(0.7%) | 1482673<br>(64%)   | 630689<br>(27.2%) |
|                    | <b>Local</b>   | 1412462 | 13.3 | 7  | 59.8<br>(16.9) | 771863<br>(54.6%)  | 1182255<br>(83.7%) | 127489<br>(9%)   | 89535<br>(6.3%)  | 13183<br>(0.9%) | 1170266<br>(82.9%) | 357884<br>(25.3%) |
|                    | <b>Distant</b> | 301295  | 0.7  | 1  | 64<br>(14.6)   | 158883<br>(52.7%)  | 241681<br>(80.2%)  | 35344<br>(11.7%) | 23987<br>(8%)    | 283<br>(0.1%)   | 122231<br>(40.6%)  | 88495<br>(29.4%)  |

**NOS=Not otherwise specified; sd=standard deviation. Note some cases were unstaged so stratified analysis may not add to the total.**

**eFigure S1: Annualized Mortality Gap Example: Ovary**

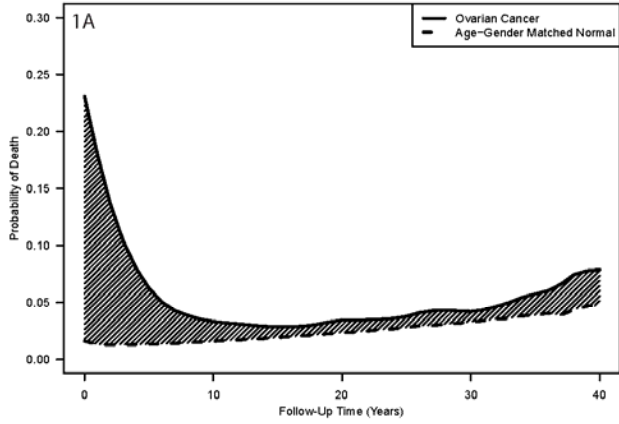

**Legend:** Figure 1A shows both the annualized mortality rate for ovarian cancer patients and age and sex-matched controls. Figure 1B shows the “gap” (shaded) between the cancer patients and controls. Figure 1C shows the graphical representations of the high risk cut-off (dotted line), and the annualized mortality gap (vertical double-arrows).

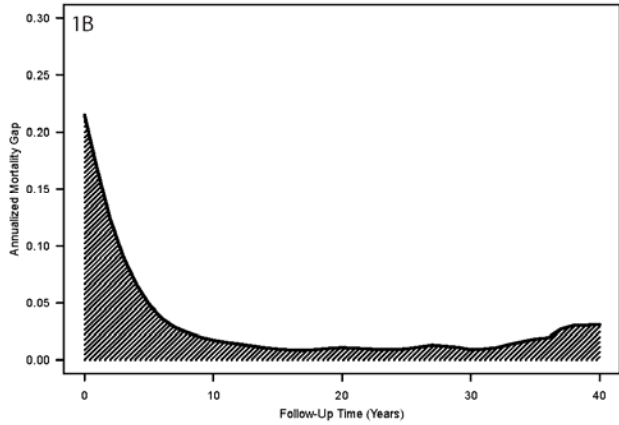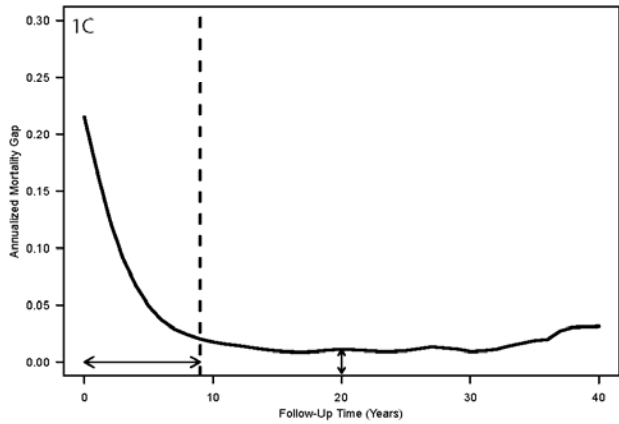

eTable 2: Survivorship trajectory details and causes of death (COD)

| Tissue                  | N      | High-risk duration | Mortality gap | Risk cluster | n=Alive at censorship | COD           |               |               |               | COD High-risk duration |
|-------------------------|--------|--------------------|---------------|--------------|-----------------------|---------------|---------------|---------------|---------------|------------------------|
|                         |        |                    |               |              |                       | 1° cancer     | 2° cancer     | Cardiac       | Other         |                        |
| Metastatic Status       |        |                    |               |              |                       | 1° cancer     | 2° cancer     | Cardiac       | Other         |                        |
| <b>Digestive System</b> |        |                    |               |              |                       |               |               |               |               |                        |
| Colon                   | 172769 | 7                  | 1.34%         | 2            | 39737 (23%)           | 56845 (32.9%) | 16975 (9.8%)  | 25565 (14.8%) | 33647 (19.5%) | 3                      |
| Local                   | 132472 | 7                  | 1.29%         | 2            | 37335(28.2%)          | 28781(21.7%)  | 12985(9.8%)   | 22896(17.3%)  | 30475(23%)    | 3                      |
| Distant                 | 32307  | 11                 | 2.47%         | 5            | 1751(5.4%)            | 24470(75.7%)  | 3162(9.8%)    | 1284(4%)      | 1640(5.1%)    | 7                      |
| Rectum                  | 77649  | 8                  | 1.58%         | 2            | 22435 (28.9%)         | 15175 (19.5%) | 18475 (23.8%) | 8928 (11.5%)  | 12636 (16.3%) | 0                      |
| Local                   | 61841  | 8                  | 1.57%         | 2            | 20936(33.9%)          | 8868(14.3%)   | 12916(20.9%)  | 7868(12.7%)   | 11253(18.2%)  | 0                      |
| Distant                 | 10197  | 9                  | 4.61%         | 5            | 699(6.9%)             | 4553(44.7%)   | 4212(41.3%)   | 286(2.8%)     | 447(4.4%)     | 1                      |
| Pancreas                | 72976  | 9                  | 4.33%         | 6            | 4827 (6.6%)           | 59473 (81.5%) | 3751 (5.1%)   | 1509 (2.1%)   | 3416 (4.7%)   | 7                      |
| Local                   | 27730  | 9                  | 3.80%         | 6            | 3144(11.3%)           | 21543(77.7%)  | 845(3%)       | 668(2.4%)     | 1530(5.5%)    | 7                      |
| Distant                 | 35519  | 15                 | 2.66%         | 6            | 1321(3.7%)            | 30140(84.9%)  | 2416(6.8%)    | 494(1.4%)     | 1148(3.2%)    | 8                      |
| Stomach                 | 54078  | 7                  | 2.57%         | 5            | 6279 (11.6%)          | 30473 (56.4%) | 8183 (15.1%)  | 3389 (6.3%)   | 5754 (10.6%)  | 4                      |
| Local                   | 30425  | 7                  | 2.51%         | 4            | 5175(17%)             | 13849(45.5%)  | 4530(14.9%)   | 2573(8.5%)    | 4298(14.1%)   | 4                      |
| Distant                 | 17922  | 8                  | 3.49%         | 6            | 724(4%)               | 13169(73.5%)  | 2892(16.1%)   | 386(2.2%)     | 751(4.2%)     | 5                      |
| Esophagus               | 32223  | 8                  | 5.46%         | 5            | 3452 (10.7%)          | 22182 (68.8%) | 2432 (7.5%)   | 1506 (4.7%)   | 2651 (8.2%)   | 5                      |
| Local                   | 17605  | 9                  | 5.21%         | 5            | 2710(15.4%)           | 10977(62.4%)  | 1216(6.9%)    | 990(5.6%)     | 1712(9.7%)    | 5                      |
| Distant                 | 9492   | 8                  | 6.68%         | 6            | 519(5.5%)             | 7494(79%)     | 880(9.3%)     | 191(2%)       | 408(4.3%)     | 6                      |
| Liver                   | 29653  | 13                 | 2.09%         | 5            | 5454 (18.4%)          | 16924 (57.1%) | 2871 (9.7%)   | 598 (2%)      | 3806 (12.8%)  | 6                      |
| Local                   | 19687  | 9                  | 2.04%         | 5            | 4780(24.3%)           | 10344(52.5%)  | 1381(7%)      | 396(2%)       | 2786(14.2%)   | 7                      |
| Distant                 | 4989   | 11                 | 1.19%         | 6            | 251(5%)               | 3446(69.1%)   | 855(17.1%)    | 76(1.5%)      | 361(7.2%)     | 4                      |
| Gum, mouth floor        | 23620  | 5                  | 5.10%         | 2            | 5339 (22.6%)          | 3439 (14.6%)  | 7490 (31.7%)  | 2366 (10%)    | 4986 (21.1%)  | 0                      |
| Local                   | 19121  | 4                  | 5.19%         | 3            | 4579(23.9%)           | 2709(14.2%)   | 6056(31.7%)   | 2010(10.5%)   | 3767(19.7%)   | 0                      |
| Distant                 | 1486   | 7                  | 7.12%         | 3            | 158(10.6%)            | 385(25.9%)    | 664(44.7%)    | 86(5.8%)      | 193(13%)      | 0                      |
| Tongue                  | 22419  | 5                  | 3.98%         | 2            | 7830 (34.9%)          | 4570 (20.4%)  | 5262 (23.5%)  | 1597 (7.1%)   | 3160 (14.1%)  | 0                      |
| Local                   | 17991  | 4                  | 3.92%         | 3            | 6729(37.4%)           | 3427(19%)     | 3915(21.8%)   | 1327(7.4%)    | 2593(14.4%)   | 0                      |
| Distant                 | 2830   | 7                  | 5.70%         | 3            | 702(24.8%)            | 834(29.5%)    | 914(32.3%)    | 115(4.1%)     | 265(9.4%)     | 0                      |
| Gallbladder             | 19800  | 12                 | 2.26%         | 5            | 2215 (11.2%)          | 8269 (41.8%)  | 6672 (33.7%)  | 909 (4.6%)    | 1735 (8.8%)   | 1                      |
| Local                   | 12449  | 8                  | 2.57%         | 5            | 1832(14.7%)           | 4577(36.8%)   | 3944(31.7%)   | 729(5.9%)     | 1367(11%)     | 1                      |
| Distant                 | 5326   | 11                 | 12.37%        | 6            | 275(5.2%)             | 2896(54.4%)   | 1912(35.9%)   | 78(1.5%)      | 165(3.1%)     | 1                      |
| Small intestine         | 14143  | 4                  | 2.91%         | 2            | 5575 (39.4%)          | 2154 (15.2%)  | 3606 (25.5%)  | 880 (6.2%)    | 1928 (13.6%)  | 0                      |
| Local                   | 7537   | 4                  | 2.75%         | 2            | 3494(46.4%)           | 1016(13.5%)   | 1370(18.2%)   | 552(7.3%)     | 1105(14.7%)   | 0                      |

|                                 |         |        |    |        |   |              |                |              |              |              |   |
|---------------------------------|---------|--------|----|--------|---|--------------|----------------|--------------|--------------|--------------|---|
|                                 | Distant | 3279   | 7  | 6.82%  | 2 | 771(23.5%)   | 990(30.2%)     | 1082(33%)    | 111(3.4%)    | 325(9.9%)    | 1 |
| Anus                            |         | 13966  | 6  | 2.44%  | 2 | 7439 (53.3%) | 1116 (8%)      | 2539 (18.2%) | 875 (6.3%)   | 1997 (14.3%) | 0 |
|                                 | Local   | 11996  | 0  | 2.49%  | 2 | 6971(58.1%)  | 722(6%)        | 1846(15.4%)  | 755(6.3%)    | 1702(14.2%)  | 0 |
|                                 | Distant | 1079   | 15 | 1.26%  | 3 | 229(21.2%)   | 277(25.7%)     | 441(40.9%)   | 35(3.2%)     | 97(9%)       | 0 |
| Lip                             |         | 11054  | 0  | 2.21%  | 1 | 3292 (29.8%) | 147 (1.3%)     | 1877 (17%)   | 2460 (22.3%) | 3278 (29.7%) | 0 |
|                                 | Local   | 9958   | 0  | 2.22%  | 1 | 3018(30.3%)  | 109(1.1%)      | 1660(16.7%)  | 2229(22.4%)  | 2942(29.5%)  | 0 |
|                                 | Distant | 83     | -  | -      | - | 17(20.5%)    | 10(12%)        | 34(41%)      | 10(12%)      | 12(14.5%)    | 0 |
| Salivary gland                  |         | 10992  | 5  | 1.76%  | 2 | 5057 (46%)   | 1559 (14.2%)   | 1964 (17.9%) | 880 (8%)     | 1532 (13.9%) | 0 |
|                                 | Local   | 7760   | 5  | 1.55%  | 2 | 3835(49.4%)  | 1042(13.4%)    | 1150(14.8%)  | 641(8.3%)    | 1092(14.1%)  | 0 |
|                                 | Distant | 1078   | 8  | 3.69%  | 2 | 272(25.2%)   | 382(35.4%)     | 263(24.4%)   | 49(4.5%)     | 112(10.4%)   | 3 |
| Peritoneum,<br>Retroperitoneum  |         | 7524   | 12 | 2.13%  | 3 | 2059 (27.4%) | 1073 (14.3%)   | 3597 (47.8%) | 228 (3%)     | 567 (7.5%)   | 0 |
|                                 | Local   | 3166   | 5  | 3.14%  | 3 | 1219(38.5%)  | 351(11.1%)     | 1237(39.1%)  | 111(3.5%)    | 248(7.8%)    | 0 |
|                                 | Distant | 2915   | 11 | 1.26%  | 2 | 502(17.2%)   | 527(18.1%)     | 1667(57.2%)  | 51(1.7%)     | 168(5.8%)    | 0 |
| Appendix                        |         | 4264   | 7  | 1.21%  | 2 | 2276(53.3%)  | 0(0%)          | 1446(33.9%)  | 206(4.8%)    | 336(7.8%)    | - |
|                                 | Local   | 2819   | -  | -      | 1 | -            | -              | -            | -            | -            | - |
|                                 | Distant | 1273   | 15 | 0.74%  | 2 | -            | -              | -            | -            | -            | - |
| Intrahepatic bile               |         | 3960   | 13 | 0.84%  | 6 | 362 (9.1%)   | 2158 (54.5%)   | 1149 (29%)   | 67 (1.7%)    | 224 (5.7%)   | 6 |
|                                 | Local   | 1888   | 12 | 12.83% | 6 | 245(13%)     | 993(52.6%)     | 508(26.9%)   | 41(2.2%)     | 101(5.3%)    | 4 |
|                                 | Distant | 1215   | 3  | 62.39% | - | 85(7%)       | 674(55.5%)     | 394(32.4%)   | 11(0.9%)     | 51(4.2%)     | 2 |
| Unspecified<br>digestive organs |         | 2675   | 19 | 1.07%  | 5 | 290 (10.8%)  | 213 (8%)       | 1820 (68%)   | 108 (4%)     | 244 (9.1%)   | 0 |
|                                 | Local   | 159    | -  | -      | - | 38(23.9%)    | 3(1.9%)        | 90(56.6%)    | 7(4.4%)      | 21(13.2%)    | 0 |
|                                 | Distant | 1829   | 12 | 12.19% | 4 | 158(8.6%)    | 131(7.2%)      | 1384(75.7%)  | 40(2.2%)     | 116(6.3%)    | 0 |
| <b>Respiratory System</b>       |         |        |    |        |   |              |                |              |              |              |   |
| Lung and Bronchus               |         | 190488 | 7  | 6.22%  | 5 | 15575 (8.2%) | 138116 (72.5%) | 9066 (4.8%)  | 11194 (5.9%) | 16537 (8.7%) | 7 |
|                                 | Local   | 52080  | 6  | 6.14%  | 4 | 11033(21.2%) | 29195(56.1%)   | 1981(3.8%)   | 3711(7.1%)   | 6160(11.8%)  | 7 |
|                                 | Distant | 56136  | 11 | 9.08%  | 6 | 2895(5.2%)   | 46045(82%)     | 2803(5%)     | 1712(3%)     | 2681(4.8%)   | 7 |
| Larynx                          |         | 36419  | 5  | 4.54%  | 2 | 8671 (23.8%) | 6949 (19.1%)   | 8129 (22.3%) | 4901 (13.5%) | 7769 (21.3%) | 0 |
|                                 | Local   | 25322  | 5  | 4.47%  | 2 | 3540(14%)    | 4639(18.3%)    | 6380(25.2%)  | 4219(16.7%)  | 6544(25.8%)  | 0 |
|                                 | Distant | 1721   | 6  | 6.99%  | 3 | 75(4.4%)     | 765(44.5%)     | 497(28.9%)   | 148(8.6%)    | 236(13.7%)   | 3 |
| Oropharynx                      |         | 15784  | 6  | 4.50%  | 2 | 5880 (37.3%) | 520 (3.3%)     | 6336 (40.1%) | 969 (6.1%)   | 2079 (13.2%) | 0 |
|                                 | Local   | 11069  | 6  | 4.73%  | 3 | 4428(40%)    | 319(2.9%)      | 4177(37.7%)  | 698(6.3%)    | 1447(13.1%)  | 0 |
|                                 | Distant | 2411   | 19 | 1.49%  | 3 | 621(25.8%)   | 154(6.4%)      | 1276(52.9%)  | 106(4.4%)    | 254(10.5%)   | 0 |
| Hypopharynx                     |         | 7037   | 5  | 9.33%  | 4 | 678 (9.6%)   | 1072 (15.2%)   | 3776 (53.7%) | 515 (7.3%)   | 996 (14.2%)  | 0 |

|                                       |         |        |    |        |   |               |               |              |               |               |    |
|---------------------------------------|---------|--------|----|--------|---|---------------|---------------|--------------|---------------|---------------|----|
|                                       | Local   | 5185   | 5  | 9.26%  | 4 | 487(9.4%)     | 743(14.3%)    | 2748(53%)    | 412(7.9%)     | 795(15.3%)    | 0  |
|                                       | Distant | 1499   | 6  | 9.80%  | 4 | 171(11.4%)    | 273(18.2%)    | 824(55%)     | 76(5.1%)      | 155(10.3%)    | 0  |
| Nasopharynx                           |         | 6614   | 7  | 2.78%  | 2 | 2370 (35.8%)  | 1917 (29%)    | 1156 (17.5%) | 329 (5%)      | 842 (12.7%)   | 4  |
|                                       | Local   | 3169   | 5  | 3.04%  | 3 | 803(25.3%)    | 1106(34.9%)   | 556(17.5%)   | 194(6.1%)     | 510(16.1%)    | 6  |
|                                       | Distant | 748    | 7  | 2.76%  | 2 | 107(14.3%)    | 317(42.4%)    | 191(25.5%)   | 36(4.8%)      | 97(13%)       | 3  |
| Pleura                                |         | 6016   | 12 | 2.96%  | 6 | 349 (5.8%)    | 934 (15.5%)   | 4178 (69.4%) | 156 (2.6%)    | 399 (6.6%)    | 0  |
|                                       | Local   | 1352   | 12 | 3.06%  | 6 | 29(2.1%)      | 246(18.2%)    | 936(69.2%)   | 37(2.7%)      | 104(7.7%)     | 0  |
|                                       | Distant | 2066   | 13 | 23.62% | 5 | 11(0.5%)      | 398(19.3%)    | 1480(71.6%)  | 56(2.7%)      | 121(5.9%)     | 0  |
| Middle ear<br>accessory sinuses       |         | 3795   | 6  | 4.08%  | 3 | 954 (25.1%)   | 898 (23.7%)   | 1164 (30.7%) | 246 (6.5%)    | 533 (14%)     | 0  |
|                                       | Local   | 1957   | 5  | 4.32%  | 3 | 602(30.8%)    | 475(24.3%)    | 540(27.6%)   | 110(5.6%)     | 230(11.8%)    | 0  |
|                                       | Distant | 399    | 6  | 3.34%  | 3 | 68(17%)       | 117(29.3%)    | 160(40.1%)   | 17(4.3%)      | 37(9.3%)      | 0  |
| Nasal Cavity                          |         | 2977   | 4  | 3.46%  | 2 | 1116 (37.5%)  | 213 (7.2%)    | 866 (29.1%)  | 276 (9.3%)    | 506 (17%)     | 0  |
|                                       | Local   | 1550   | 5  | 2.96%  | 2 | 686(44.3%)    | 95(6.1%)      | 396(25.5%)   | 128(8.3%)     | 245(15.8%)    | 0  |
|                                       | Distant | 390    | 10 | 1.20%  | 1 | 183(46.9%)    | 52(13.3%)     | 105(26.9%)   | 12(3.1%)      | 38(9.7%)      | 0  |
| Pharynx                               |         | 2473   | 6  | 6.07%  | 4 | 392 (15.9%)   | 453 (18.3%)   | 1054 (42.6%) | 195 (7.9%)    | 379 (15.3%)   | 0  |
|                                       | Local   | 1536   | 6  | 6.74%  | 4 | 241(15.7%)    | 286(18.6%)    | 663(43.2%)   | 124(8.1%)     | 222(14.5%)    | 0  |
|                                       | Distant | 359    | 17 | 8.30%  | - | 40(11.1%)     | 91(25.3%)     | 185(51.5%)   | 14(3.9%)      | 29(8.1%)      | 0  |
| Mediastinum                           |         | 1824   | 6  | 0.85%  | 2 | 981 (53.8%)   | 134 (7.3%)    | 518 (28.4%)  | 55 (3%)       | 136 (7.5%)    | 0  |
|                                       | Local   | 535    | 7  | 0.61%  | 2 | 271(50.7%)    | 49(9.2%)      | 142(26.5%)   | 27(5%)        | 46(8.6%)      | 0  |
|                                       | Distant | 269    | 4  | 1.37%  | 3 | 71(26.4%)     | 41(15.2%)     | 125(46.5%)   | 7(2.6%)       | 25(9.3%)      | 0  |
| Trachea                               |         | 514    | 12 | 3.77%  | 4 | 98 (19.1%)    | 125 (24.3%)   | 206 (40.1%)  | 37 (7.2%)     | 48 (9.3%)     | 0  |
|                                       | Local   | 255    | 10 | 3.31%  | 4 | 40(15.7%)     | 68(26.7%)     | 103(40.4%)   | 19(7.5%)      | 25(9.8%)      | 0  |
|                                       | Distant | 71     | -  | -      | - | 1(1.4%)       | 22(31%)       | 36(50.7%)    | 9(12.7%)      | 3(4.2%)       | 0  |
| <b>Bones and joints, soft tissues</b> |         |        |    |        |   |               |               |              |               |               |    |
| Breast                                |         | 188751 | 0  | 1.77%  | 1 | 89456 (47.4%) | 40871 (21.7%) | 11291 (6%)   | 19204 (10.2%) | 27929 (14.8%) | 5  |
|                                       | Local   | 171618 | 0  | 1.58%  | 1 | 86912(50.6%)  | 30877(18%)    | 10075(5.9%)  | 17766(10.4%)  | 25988(15.1%)  | 0  |
|                                       | Distant | 10111  | 17 | 2.17%  | 2 | 1041(10.3%)   | 7296(72.2%)   | 532(5.3%)    | 552(5.5%)     | 690(6.8%)     | 13 |
| Skin                                  |         | 113139 | 4  | 0.39%  | 1 | 72551 (64.1%) | 10155 (9%)    | 8216 (7.3%)  | 7943 (7%)     | 14274 (12.6%) | 0  |
|                                       | Local   | 94413  | 0  | 0.28%  | 1 | 64582(68.4%)  | 7266(7.7%)    | 5445(5.8%)   | 6558(6.9%)    | 10562(11.2%)  | 0  |
|                                       | Distant | 2702   | 7  | 1.52%  | 3 | 431(16%)      | 1705(63.1%)   | 304(11.3%)   | 96(3.6%)      | 166(6.1%)     | 5  |
| Bones, joints                         |         | 10331  | 9  | 1.26%  | 2 | 5254 (50.9%)  | 2012 (19.5%)  | 1791 (17.3%) | 374 (3.6%)    | 900 (8.7%)    | 3  |
|                                       | Local   | 5781   | 8  | 0.98%  | 2 | 3311(57.3%)   | 1195(20.7%)   | 606(10.5%)   | 208(3.6%)     | 461(8%)       | 4  |
|                                       | Distant | 2334   | 10 | 2.63%  | 2 | 813(34.8%)    | 627(26.9%)    | 639(27.4%)   | 68(2.9%)      | 187(8%)       | 2  |
| Connective soft                       |         | 24186  | 7  | 1.18%  | 2 | 10999 (45.5%) | 5074 (21%)    | 3904 (16.1%) | 1479 (6.1%)   | 2730 (11.3%)  | 3  |

|                              |         |        |    |        |   |               |               |               |             |               |    |
|------------------------------|---------|--------|----|--------|---|---------------|---------------|---------------|-------------|---------------|----|
| tissue                       |         |        |    |        |   |               |               |               |             |               |    |
|                              | Local   | 17130  | 8  | 1.00%  | 2 | 9003(52.6%)   | 3076(18%)     | 2039(11.9%)   | 1114(6.5%)  | 1898(11.1%)   | 4  |
|                              | Distant | 3163   | 7  | 1.43%  | 3 | 548(17.3%)    | 1469(46.4%)   | 898(28.4%)    | 69(2.2%)    | 179(5.7%)     | 4  |
| Heart                        |         | 239    | 10 | 1.13%  | 5 | 46 (19.2%)    | 118 (49.4%)   | 47 (19.7%)    | 8 (3.3%)    | 20 (8.4%)     | 5  |
|                              | Local   | 105    | -  | -      | - | 16(15.2%)     | 68(64.8%)     | 14(13.3%)     | 3(2.9%)     | 4(3.8%)       | 5  |
|                              | Distant | 65     | -  | -      | - | 5(7.7%)       | 46(70.8%)     | 8(12.3%)      | 1(1.5%)     | 5(7.7%)       | 4  |
| <b>Female Genital System</b> |         |        |    |        |   |               |               |               |             |               |    |
| Cervix                       |         | 123836 | 4  | 0.38%  | 1 | 89294 (72.1%) | 8359 (6.8%)   | 8342 (6.7%)   | 5256 (4.2%) | 12585 (10.2%) | 3  |
|                              | Local   | 118625 | 0  | 0.36%  | 1 | 88208(74.4%)  | 5904(5%)      | 7549(6.4%)    | 4937(4.2%)  | 12027(10.1%)  | 3  |
|                              | Distant | 2911   | 12 | 3.14%  | 4 | 298(10.2%)    | 1873(64.3%)   | 466(16%)      | 94(3.2%)    | 180(6.2%)     | 6  |
| Uterus                       |         | 75885  | 5  | 0.70%  | 1 | 32792 (43.2%) | 5771 (7.6%)   | 11859 (15.6%) | 9836 (13%)  | 15627 (20.6%) | 3  |
|                              | Local   | 66816  | 4  | 0.68%  | 1 | 30951(46.3%)  | 3550(5.3%)    | 9025(13.5%)   | 8946(13.4%) | 14344(21.5%)  | 3  |
|                              | Distant | 5664   | 8  | 1.97%  | 3 | 975(17.2%)    | 1795(31.7%)   | 2086(36.8%)   | 329(5.8%)   | 479(8.5%)     | 6  |
| Ovary                        |         | 63542  | 9  | 1.17%  | 3 | 19777 (31.1%) | 31756 (50%)   | 4548 (7.2%)   | 2607 (4.1%) | 4854 (7.6%)   | 9  |
|                              | Local   | 21118  | 0  | 1.04%  | 1 | 12299(58.2%)  | 3469(16.4%)   | 1495(7.1%)    | 1354(6.4%)  | 2501(11.8%)   | 5  |
|                              | Distant | 39164  | 14 | 1.85%  | 2 | 6841(17.5%)   | 26557(67.8%)  | 2721(6.9%)    | 1045(2.7%)  | 2000(5.1%)    | 11 |
| Vulva                        |         | 18994  | 3  | 1.30%  | 1 | 11773 (62%)   | 1300 (6.8%)   | 1595 (8.4%)   | 1513 (8%)   | 2813 (14.8%)  | 0  |
|                              | Local   | 18140  | 3  | 1.28%  | 1 | 11606(64%)    | 1017(5.6%)    | 1442(7.9%)    | 1411(7.8%)  | 2664(14.7%)   | 0  |
|                              | Distant | 281    | 6  | 21.88% | 4 | 25(8.9%)      | 157(55.9%)    | 54(19.2%)     | 23(8.2%)    | 22(7.8%)      | 0  |
| Vagina, labia                |         | 8794   | 5  | 1.41%  | 1 | 4568 (51.9%)  | 661 (7.5%)    | 1504 (17.1%)  | 748 (8.5%)  | 1313 (14.9%)  | 0  |
|                              | Local   | 6203   | 4  | 1.42%  | 1 | 3136(50.6%)   | 278(4.5%)     | 1052(17%)     | 638(10.3%)  | 1099(17.7%)   | 0  |
|                              | Distant | 452    | 9  | 2.69%  | 3 | 42(9.3%)      | 144(31.9%)    | 185(40.9%)    | 26(5.8%)    | 55(12.2%)     | 0  |
| Other female<br>genitals     |         | 3060   | 8  | 1.68%  | 2 | 1153 (37.7%)  | 570 (18.6%)   | 898 (29.3%)   | 156 (5.1%)  | 283 (9.2%)    | 0  |
|                              | Local   | 1377   | 7  | 1.35%  | 2 | 680(49.4%)    | 193(14%)      | 258(18.7%)    | 91(6.6%)    | 155(11.3%)    | 0  |
|                              | Distant | 1427   | 10 | 2.75%  | 2 | 408(28.6%)    | 355(24.9%)    | 534(37.4%)    | 49(3.4%)    | 81(5.7%)      | 0  |
| Uterus NOS                   |         | 1903   | 7  | 1.71%  | 3 | 493 (25.9%)   | 655 (34.4%)   | 475 (25%)     | 93 (4.9%)   | 187 (9.8%)    | 1  |
|                              | Local   | 600    | 12 | 0.83%  | 3 | 247(41.2%)    | 160(26.7%)    | 128(21.3%)    | 19(3.2%)    | 46(7.7%)      | 1  |
|                              | Distant | 654    | 11 | 8.71%  | 4 | 81(12.4%)     | 300(45.9%)    | 220(33.6%)    | 15(2.3%)    | 38(5.8%)      | 1  |
| Placenta                     |         | 573    | 3  | 0.27%  | 1 | 492(85.9%)    | 17(3%)        | 30(5.2%)      | 3(0.5%)     | 31(5.4%)      | 3  |
|                              | Local   | 220    | -  | -      | 1 | -             | -             | -             | -           | -             | -  |
|                              | Distant | 293    | 3  | 00.11% | 1 | -             | -             | -             | -           | -             | -  |
| <b>Male Genital System</b>   |         |        |    |        |   |               |               |               |             |               |    |
| Prostate                     |         | 206889 | 0  | 2.16%  | 1 | 86227 (41.7%) | 36068 (17.4%) | 15858 (7.7%)  | 31087 (15%) | 37649 (18.2%) | 0  |
|                              | Local   | 110187 | 0  | 0.71%  | 1 | 77225(70.1%)  | 5319(4.8%)    | 6280(5.7%)    | 8674(7.9%)  | 12689(11.5%)  | 0  |



|                                     |         |        |    |        |   |               |               |               |              |               |    |
|-------------------------------------|---------|--------|----|--------|---|---------------|---------------|---------------|--------------|---------------|----|
|                                     | Distant | 92799  | 16 | 9.44%  | 2 | 1072(21.4%)   | 2731(54.6%)   | 280(5.6%)     | 388(7.8%)    | 534(10.7%)    | 8  |
| Testis                              |         | 26112  | 3  | 0.27%  | 1 | 21478 (82.3%) | 1097 (4.2%)   | 1392 (5.3%)   | 599 (2.3%)   | 1546 (5.9%)   | 2  |
|                                     | Local   | 22044  | 0  | 0.18%  | 1 | 19185(87%)    | 434(2%)       | 754(3.4%)     | 473(2.1%)    | 1198(5.4%)    | 0  |
|                                     | Distant | 2848   | 4  | 0.78%  | 1 | 1730(60.7%)   | 611(21.5%)    | 240(8.4%)     | 55(1.9%)     | 212(7.4%)     | 4  |
| Penis, scrotum                      |         | 5558   | 3  | 2.00%  | 1 | 2301 (41.4%)  | 472 (8.5%)    | 739 (13.3%)   | 784 (14.1%)  | 1262 (22.7%)  | 0  |
|                                     | Local   | 5075   | 3  | 2.04%  | 2 | 2190(43.2%)   | 378(7.4%)     | 658(13%)      | 728(14.3%)   | 1121(22.1%)   | 0  |
|                                     | Distant | 126    | -  | -      | - | 14(11.1%)     | 63(50%)       | 33(26.2%)     | 5(4%)        | 11(8.7%)      | 0  |
| Epididymis,<br>spermatic cord       |         | 452    | 2  | 1.32%  | 1 | 195 (43.1%)   | 13 (2.9%)     | 122 (27%)     | 41 (9.1%)    | 81 (17.9%)    | 0  |
|                                     | Local   | 364    | 0  | 1.37%  | 1 | 170(46.7%)    | 10(2.7%)      | 86(23.6%)     | 33(9.1%)     | 65(17.9%)     | 0  |
|                                     | Distant | 34     | -  | -      | - | 10(29.4%)     | 2(5.9%)       | 16(47.1%)     | 1(2.9%)      | 5(14.7%)      | 0  |
| <b>Urinary System</b>               |         |        |    |        |   |               |               |               |              |               |    |
| Bladder                             |         | 129717 | 4  | 2.45%  | 2 | 39366 (30.3%) | 24945 (19.2%) | 15386 (11.9%) | 20756 (16%)  | 29264 (22.6%) | 1  |
|                                     | Local   | 120384 | 4  | 2.46%  | 2 | 38278(31.8%)  | 20585(17.1%)  | 14210(11.8%)  | 19655(16.3%) | 27656(23%)    | 1  |
|                                     | Distant | 3980   | 6  | 5.21%  | 4 | 188(4.7%)     | 2863(71.9%)   | 472(11.9%)    | 174(4.4%)    | 283(7.1%)     | 5  |
| Kidney                              |         | 77884  | 4  | 2.59%  | 2 | 33928 (43.6%) | 23655 (30.4%) | 4895 (6.3%)   | 5847 (7.5%)  | 9559 (12.3%)  | 4  |
|                                     | Local   | 58775  | 3  | 2.47%  | 2 | 31899(54.3%)  | 10238(17.4%)  | 3467(5.9%)    | 4974(8.5%)   | 8197(13.9%)   | 2  |
|                                     | Distant | 15310  | 10 | 2.32%  | 4 | 1338(8.7%)    | 11833(77.3%)  | 1011(6.6%)    | 407(2.7%)    | 721(4.7%)     | 8  |
| Ureter, renal pelvis                |         | 11920  | 5  | 2.96%  | 2 | 3104 (26%)    | 655 (5.5%)    | 4363 (36.6%)  | 1500 (12.6%) | 2298 (19.3%)  | 0  |
|                                     | Local   | 10253  | 5  | 2.86%  | 2 | 2955(28.8%)   | 481(4.7%)     | 3319(32.4%)   | 1389(13.5%)  | 2109(20.6%)   | 0  |
|                                     | Distant | 1125   | 5  | 29.99% | 4 | 64(5.7%)      | 128(11.4%)    | 836(74.3%)    | 34(3%)       | 63(5.6%)      | 0  |
| Other Unspecified<br>urinary organs |         | 2299   | 6  | 2.03%  | 2 | 673 (29.3%)   | 262 (11.4%)   | 685 (29.8%)   | 284 (12.4%)  | 395 (17.2%)   | 0  |
|                                     | Local   | 1527   | 5  | 2.47%  | 2 | 457(29.9%)    | 168(11%)      | 453(29.7%)    | 182(11.9%)   | 267(17.5%)    | 0  |
|                                     | Distant | 239    | 10 | 9.75%  | 4 | 21(8.8%)      | 59(24.7%)     | 129(54%)      | 13(5.4%)     | 17(7.1%)      | 0  |
| <b>Brain, CNS, Spine</b>            |         |        |    |        |   |               |               |               |              |               |    |
| Brain, CNS, Spine                   |         | 47291  | 6  | 3.1%   | 5 | 9920 (21%)    | 28507 (60.3%) | 2079 (4.4%)   | 804 (1.7%)   | 5981 (12.6%)  | 13 |
|                                     | Local   | -      | -  | -      | - | -             | -             | -             | -            | -             | -  |
|                                     | Distant | 20     | -  | -      | - | 3(-)          | -             | 11(-)         | -            | 6(-)          | -  |
| Cerebellum                          |         | 3365   | 8  | 0.81%  | 2 | 2026 (60.2%)  | 852 (25.3%)   | 141 (4.2%)    | 37 (1.1%)    | 309 (9.2%)    | 8  |
|                                     | Local   | -      | -  | -      | - | -             | -             | -             | -            | -             | -  |
|                                     | Distant | -      | -  | -      | - | -             | -             | -             | -            | -             | -  |
| Meninges                            |         | 1071   | 4  | 4.23%  | 2 | 331 (30.9%)   | 218 (20.4%)   | 110 (10.3%)   | 89 (8.3%)    | 323 (30.2%)   | 0  |
|                                     | Local   | -      | -  | -      | - | -             | -             | -             | -            | -             | -  |
|                                     | Distant | 2      | -  | -      | - | -             | -             | 1(-)          | -            | 1(-)          | -  |

|                         |       |   |       |   |               |              |              |            |              |    |
|-------------------------|-------|---|-------|---|---------------|--------------|--------------|------------|--------------|----|
| Ventricle               | 1001  | 6 | 1.49% | 2 | 493 (49.3%)   | 290 (29%)    | 49 (4.9%)    | 13 (1.3%)  | 156 (15.6%)  | 5  |
| Local                   | -     | - | -     | - | -             | -            | -            | -          | -            | -  |
| Distant                 | 1     | - | -     | - | 1(-)          | -            | -            | -          | -            | -  |
| Other Nervous System    | 548   | 6 | 2.95% | 3 | 159 (29%)     | 17 (3.1%)    | 228 (41.6%)  | 17 (3.1%)  | 127 (23.2%)  | 0  |
| Local                   | -     | - | -     | - | -             | -            | -            | -          | -            | -  |
| Distant                 | 11    | - | -     | - | 3(-)          | -            | 5(-)         | -          | 3(-)         | -  |
| Pineal Gland            | 502   | 3 | 1.16% | 2 | 313 (62.4%)   | 66 (13.1%)   | 62 (12.4%)   | 6 (1.2%)   | 55 (11%)     | 4  |
| Local                   | 265   | 3 | 1.26% | 2 | 146(55.1%)    | 40(15.1%)    | 41(15.5%)    | 4(1.5%)    | 34(12.8%)    | 0  |
| Distant                 | 39    | - | -     | - | 16(-)         | 10(-)        | 3(-)         | -          | 10(-)        | 0  |
| Pituitary gland         | 211   | 3 | 1.95% | 1 | 120 (56.9%)   | 9 (4.3%)     | 25 (11.8%)   | 13 (6.2%)  | 44 (20.9%)   | 0  |
| Local                   | 104   | - | -     | - | 56(53.8%)     | 3(2.9%)      | 13(12.5%)    | 8(7.7%)    | 24(23.1%)    | 0  |
| Distant                 | 7     | - | -     | - | 2(-)          | -            | -            | -          | 2(-)         | 0  |
| <b>Eye and Orbit</b>    |       |   |       |   |               |              |              |            |              | 0  |
| Orbit, lacrimal gland   | 7354  | 0 | 2.29% | 1 | 3522 (47.9%)  | 481 (6.5%)   | 1534 (20.9%) | 659 (9%)   | 1158 (15.7%) | 0  |
| Local                   | 5058  | 0 | 2.73% | 2 | 2352(46.5%)   | 412(8.1%)    | 1029(20.3%)  | 461(9.1%)  | 804(15.9%)   | 0  |
| Distant                 | 144   | - | -     | - | 42(29.2%)     | 24(16.7%)    | 56(38.9%)    | 7(4.9%)    | 15(10.4%)    | 0  |
| Retina                  | 959   | 0 | 0.40% | 1 | 819 (85.4%)   | 51 (5.3%)    | 51 (5.3%)    | 5 (0.5%)   | 33 (3.4%)    | 4  |
| Local                   | 784   | 0 | 0.34% | 1 | 698(89%)      | 33(4.2%)     | 26(3.3%)     | 3(0.4%)    | 24(3.1%)     | 2  |
| Distant                 | 57    | - | -     | - | 38(66.7%)     | 8(14%)       | 8(14%)       | 1(1.8%)    | 2(3.5%)      | 2  |
| Eyeball                 | 804   | 0 | 2.50% | 1 | 297 (36.9%)   | 74 (9.2%)    | 218 (27.1%)  | 92 (11.4%) | 123 (15.3%)  | 0  |
| Local                   | 678   | 0 | 2.53% | 2 | 253(37.3%)    | 65(9.6%)     | 178(26.3%)   | 83(12.2%)  | 99(14.6%)    | 0  |
| Distant                 | 9     | - | -     | - | 2(-)          | 4(-)         | 2(-)         | NA(-)      | 1(-)         | 0  |
| Eye NOS                 | 597   | 7 | 3.49% | 2 | 171 (28.6%)   | 64 (10.7%)   | 198 (33.2%)  | 67 (11.2%) | 97 (16.2%)   | 0  |
| Local                   | 269   | 0 | 3.57% | 2 | 86(32%)       | 26(9.7%)     | 68(25.3%)    | 33(12.3%)  | 56(20.8%)    | 0  |
| Distant                 | 20    | - | -     | - | 2(-)          | 5(-)         | 10(-)        | NA(-)      | 3(-)         | 0  |
| <b>Endocrine System</b> |       |   |       |   |               |              |              |            |              |    |
| Thyroid gland           | 70078 | 2 | 0.26% | 1 | 58013 (82.8%) | 3069 (4.4%)  | 2899 (4.1%)  | 2081 (3%)  | 4016 (5.7%)  | 1  |
| Local                   | 64251 | 0 | 0.15% | 1 | 55054(85.7%)  | 1725(2.7%)   | 2264(3.5%)   | 1759(2.7%) | 3449(5.4%)   | 1  |
| Distant                 | 3043  | 3 | 2.15% | 1 | 1348(44.3%)   | 1123(36.9%)  | 246(8.1%)    | 107(3.5%)  | 219(7.2%)    | 8  |
| Adrenal glands          | 2409  | 8 | 1.78% | 3 | 921 (38.2%)   | 1030 (42.8%) | 235 (9.8%)   | 64 (2.7%)  | 159 (6.6%)   | 8  |
| Local                   | 689   | 5 | 2.08% | 2 | 280(40.6%)    | 253(36.7%)   | 58(8.4%)     | 31(4.5%)   | 67(9.7%)     | 8  |
| Distant                 | 826   | 7 | 1.02% | 3 | 192(23.2%)    | 493(59.7%)   | 80(9.7%)     | 13(1.6%)   | 48(5.8%)     | 10 |
| Thymus gland            | 2184  | 4 | 4.69% | 2 | 951 (43.5%)   | 464 (21.2%)  | 262 (12%)    | 139 (6.4%) | 368 (16.8%)  | 0  |

|                   |         |         |    |        |   |               |               |               |               |               |   |
|-------------------|---------|---------|----|--------|---|---------------|---------------|---------------|---------------|---------------|---|
|                   | Local   | 797     | 2  | 4.33%  | 2 | 224(28.1%)    | 184(23.1%)    | 117(14.7%)    | 86(10.8%)     | 186(23.3%)    | 0 |
|                   | Distant | 256     | 10 | 13.80% | 2 | 16(6.2%)      | 117(45.7%)    | 49(19.1%)     | 13(5.1%)      | 61(23.8%)     | 0 |
| Spleen            |         | 1588    | 4  | 3.48%  | 2 | 773(48.7%)    | 393(24.7%)    | 118(7.4%)     | 109(6.9%)     | 195(12.3%)    | 4 |
|                   | Local   | -       | -  | -      | - | -             | -             | -             | -             | -             | - |
|                   | Distant | 4       | -  | -      | - | -             | -             | -             | -             | -             | - |
| Parathyroid gland |         | 243     | 0  | 2.35%  | 1 | 140 (57.6%)   | 1 (0.4%)      | 38 (15.6%)    | 26 (10.7%)    | 38 (15.6%)    | 0 |
|                   | Local   | 135     | -  | -      | - | 63(46.7%)     | 1(0.7%)       | 20(14.8%)     | 23(17%)       | 28(20.7%)     | - |
|                   | Distant | 13      | -  | -      | - | 1(-)          | -             | 10(-)         | -             | 2(-)          | - |
| <b>Other</b>      |         |         |    |        |   |               |               |               |               |               |   |
| Ill-defined       |         | 1986    | 7  | 2.74%  | 3 | 477(24%)      | 612(30.8%)    | 613(30.9%)    | 93(4.7%)      | 191(9.6%)     | 1 |
|                   | Local   | -       | -  | -      | - | -             | -             | -             | -             | -             | - |
|                   | Distant | 10      | -  | -      | - | -             | -             | -             | -             | -             | - |
| All cancers       |         | 2317185 | -  | -      | - | 838430(36.3%) | 704423(30.5%) | 245056(10.6%) | 201156(8.7%)  | 319709(13.8%) | - |
|                   | Local   | 1412462 | -  | -      | - | 217296(30.3%) | 7848(1.1%)    | 119520(16.7%) | 160488(22.4%) | 211824(29.5%) | - |
|                   | Distant | 301295  | -  | -      | - | 1224(20.5%)   | 720(12%)      | 2448(41%)     | 720(12%)      | 864(14.5%)    | - |

**COD=Cause of death; NOS=Not otherwise specified. Note some cases were unstaged so stratified analysis may not add to the total.**

**eFigure 2: Age-sex matched mortality gap for all tumor types**

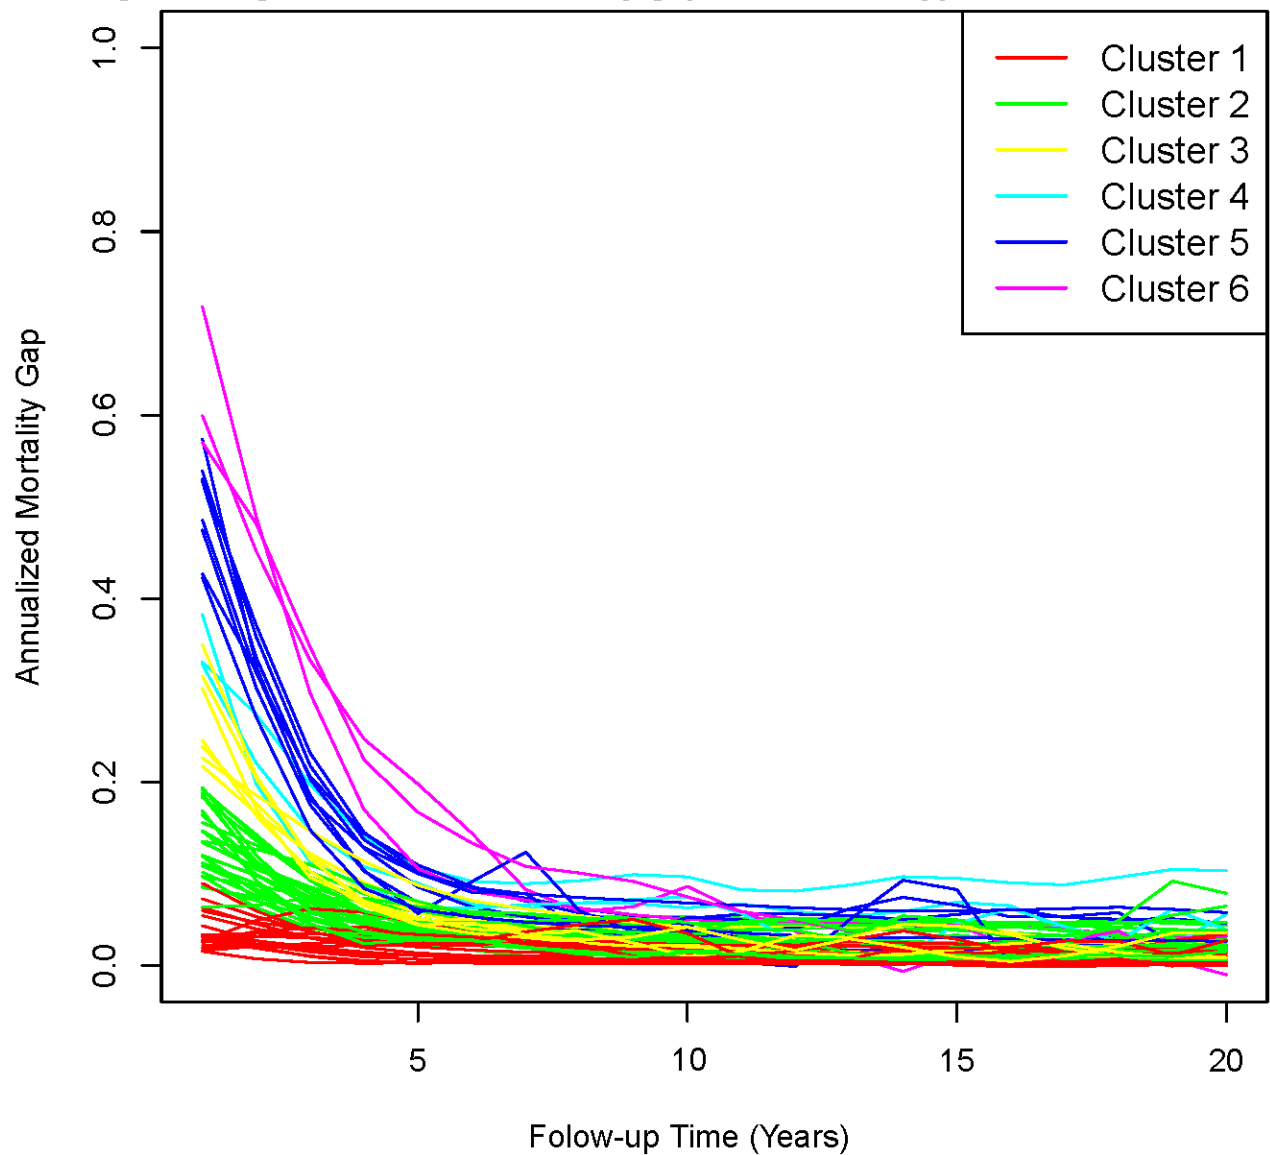

**Legend:** The annualized mortality gap for all 66 investigated cancers is shown, color-coded by each determined cluster.

**eFigure 3: Ovarian cancer mortality gaps by histology**

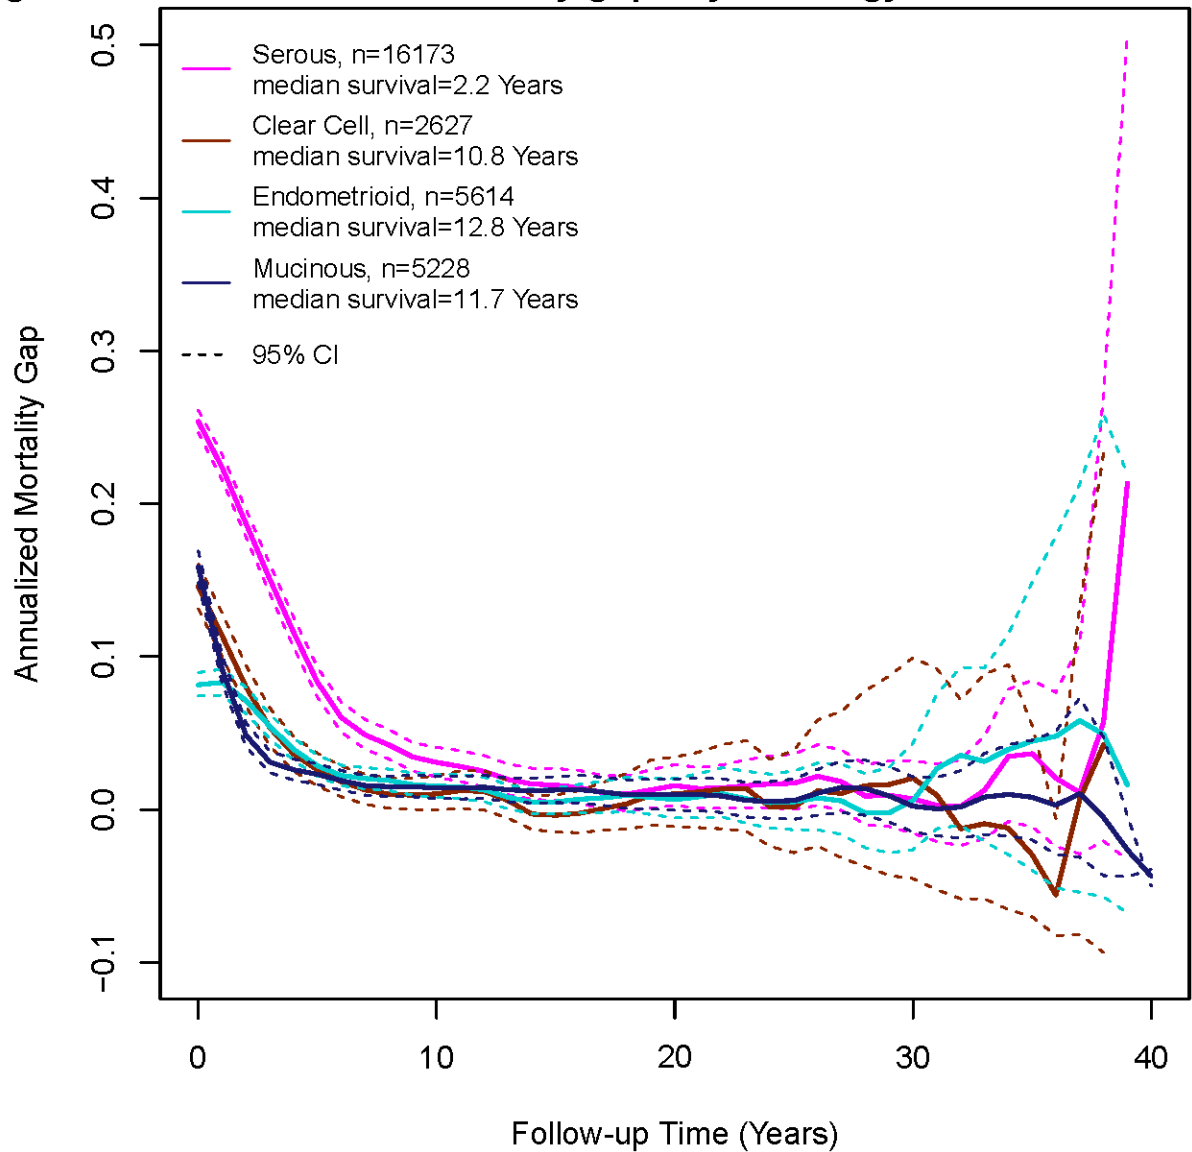

**Legend:** The age-sex-matched annualized mortality gap for 4 common ovarian cancer histologies are depicted above. 95% confidence intervals widen over time due to decreasing population size.
